# Supplementary material
Source: PubMed Central journal article supplement (PMC3018865)

# SUPPORTING INFORMATION

## PART 2

### Synthesis of a Versatile Building Block for the Preparation of 6-*N*-Derivatized $\alpha$ - Galactosyl Ceramides: Rapid Access to Biologically Active Glycolipids

*Peter J. Jervis,<sup>†</sup> Liam R. Cox,<sup>‡,\*</sup> Gurdyal S. Besra<sup>†,\*</sup>*

<sup>‡</sup>School of Chemistry, The University of Birmingham, Edgbaston, Birmingham,  
B15 2TT, United Kingdom. <sup>†</sup>School of Biosciences, The University of  
Birmingham, Edgbaston, Birmingham, B15 2TT, United Kingdom

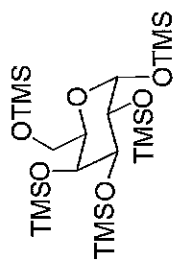

13, 300 MHz (CDCl<sub>3</sub>)

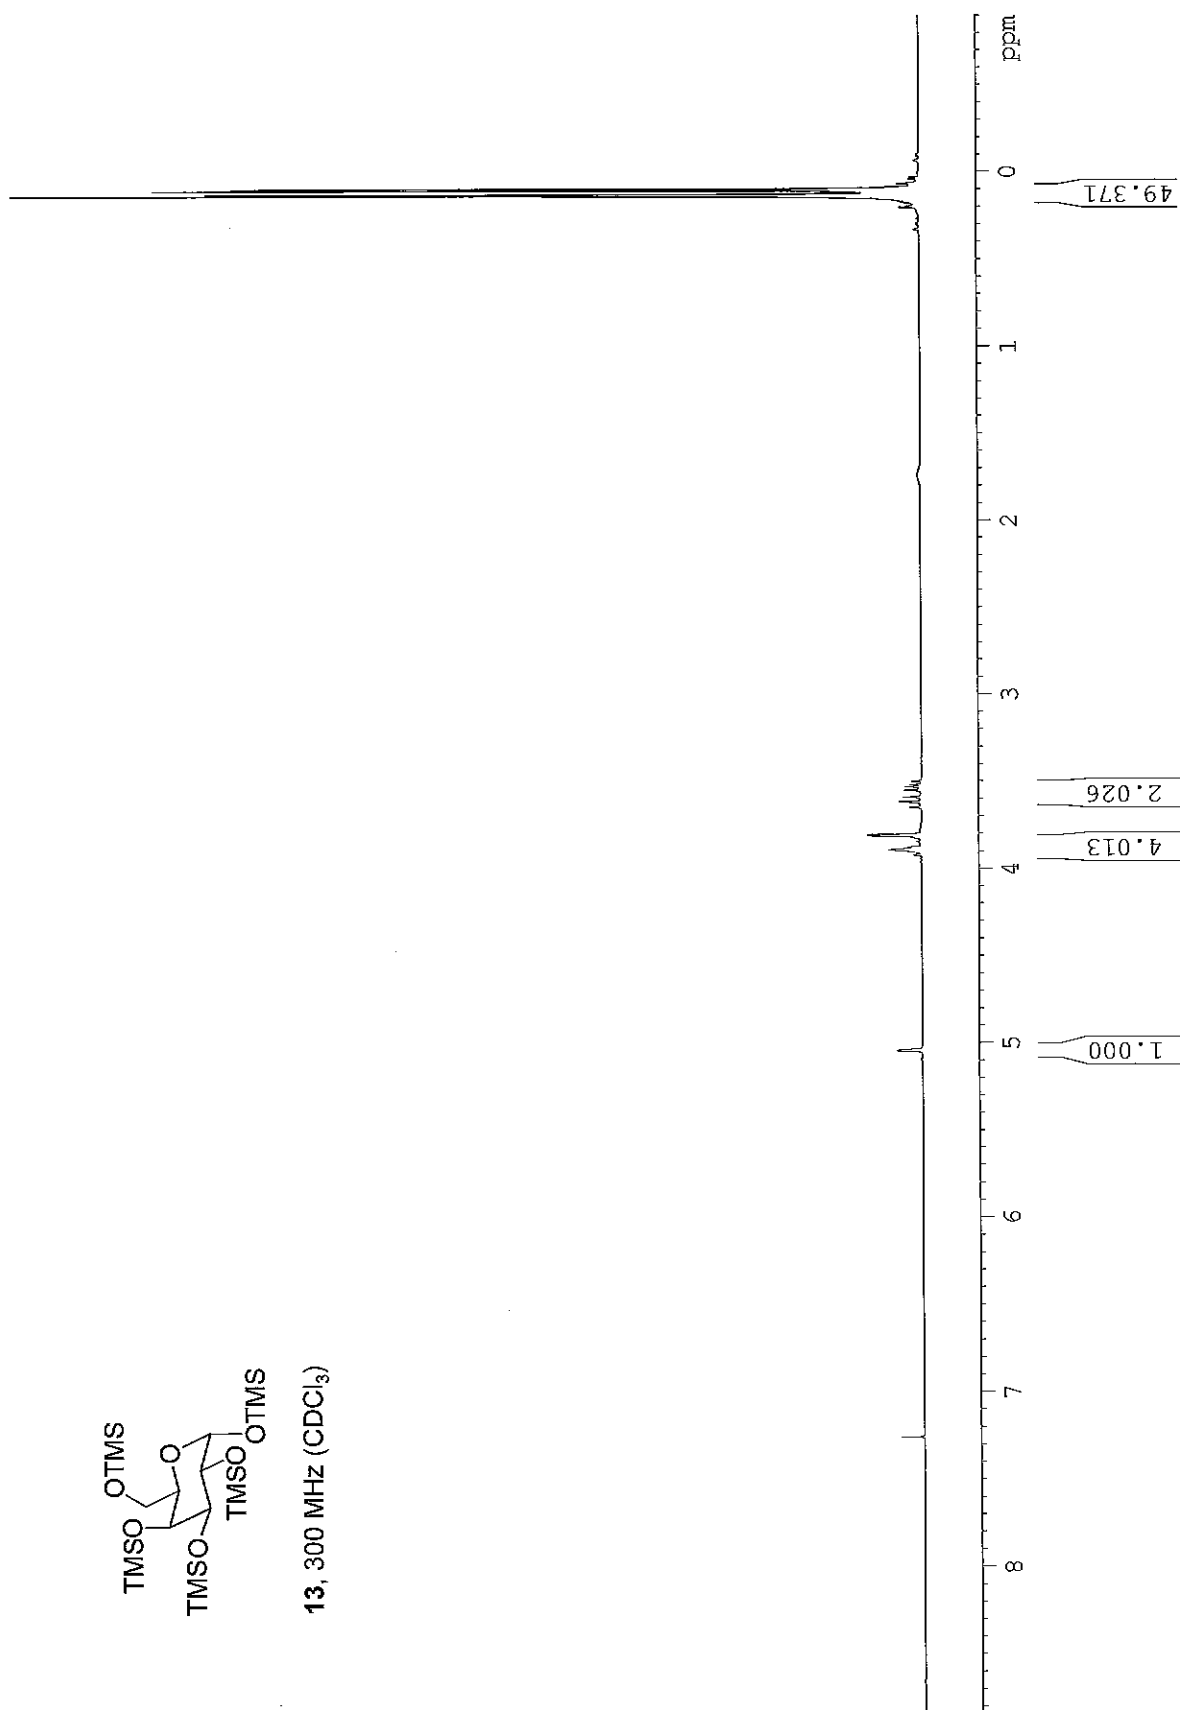

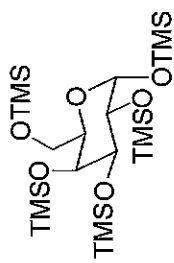

13, 100 MHz (CDCl<sub>3</sub>)

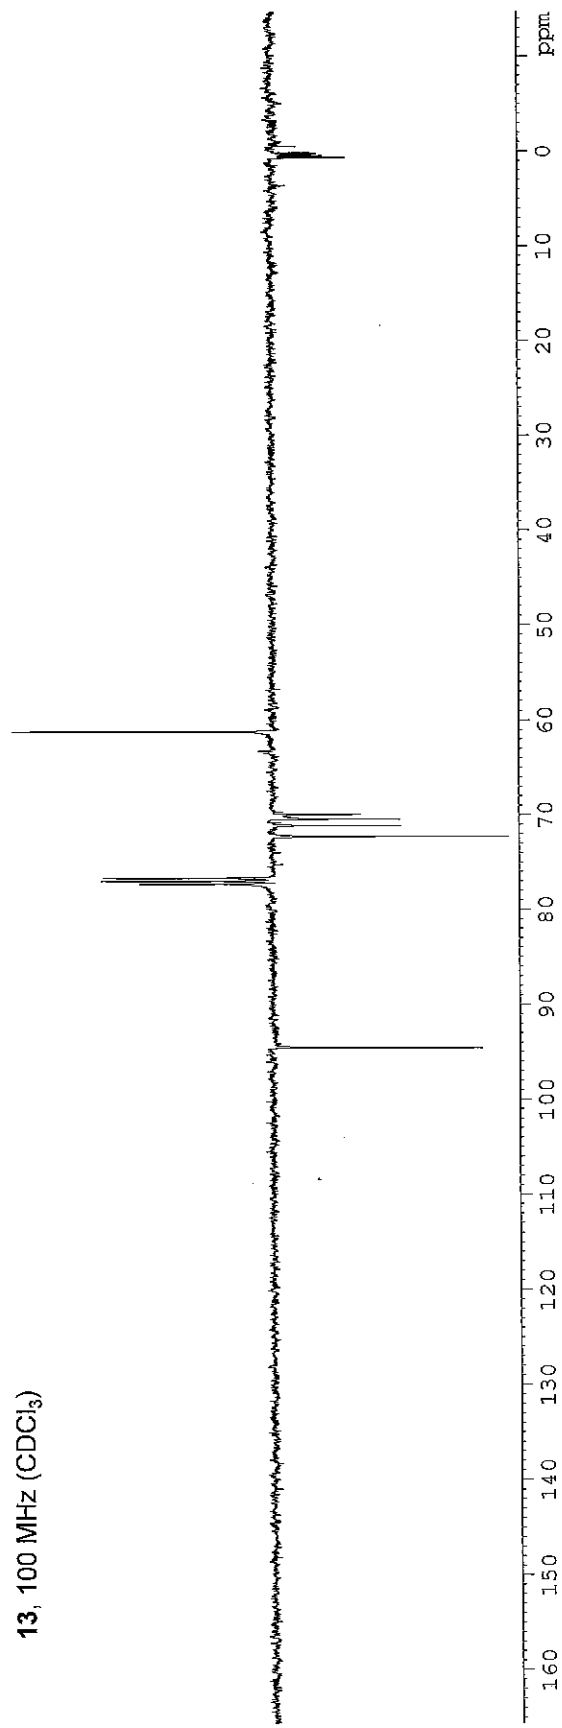



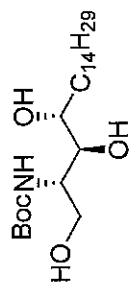

18, 100 MHz (CDCl<sub>3</sub>)

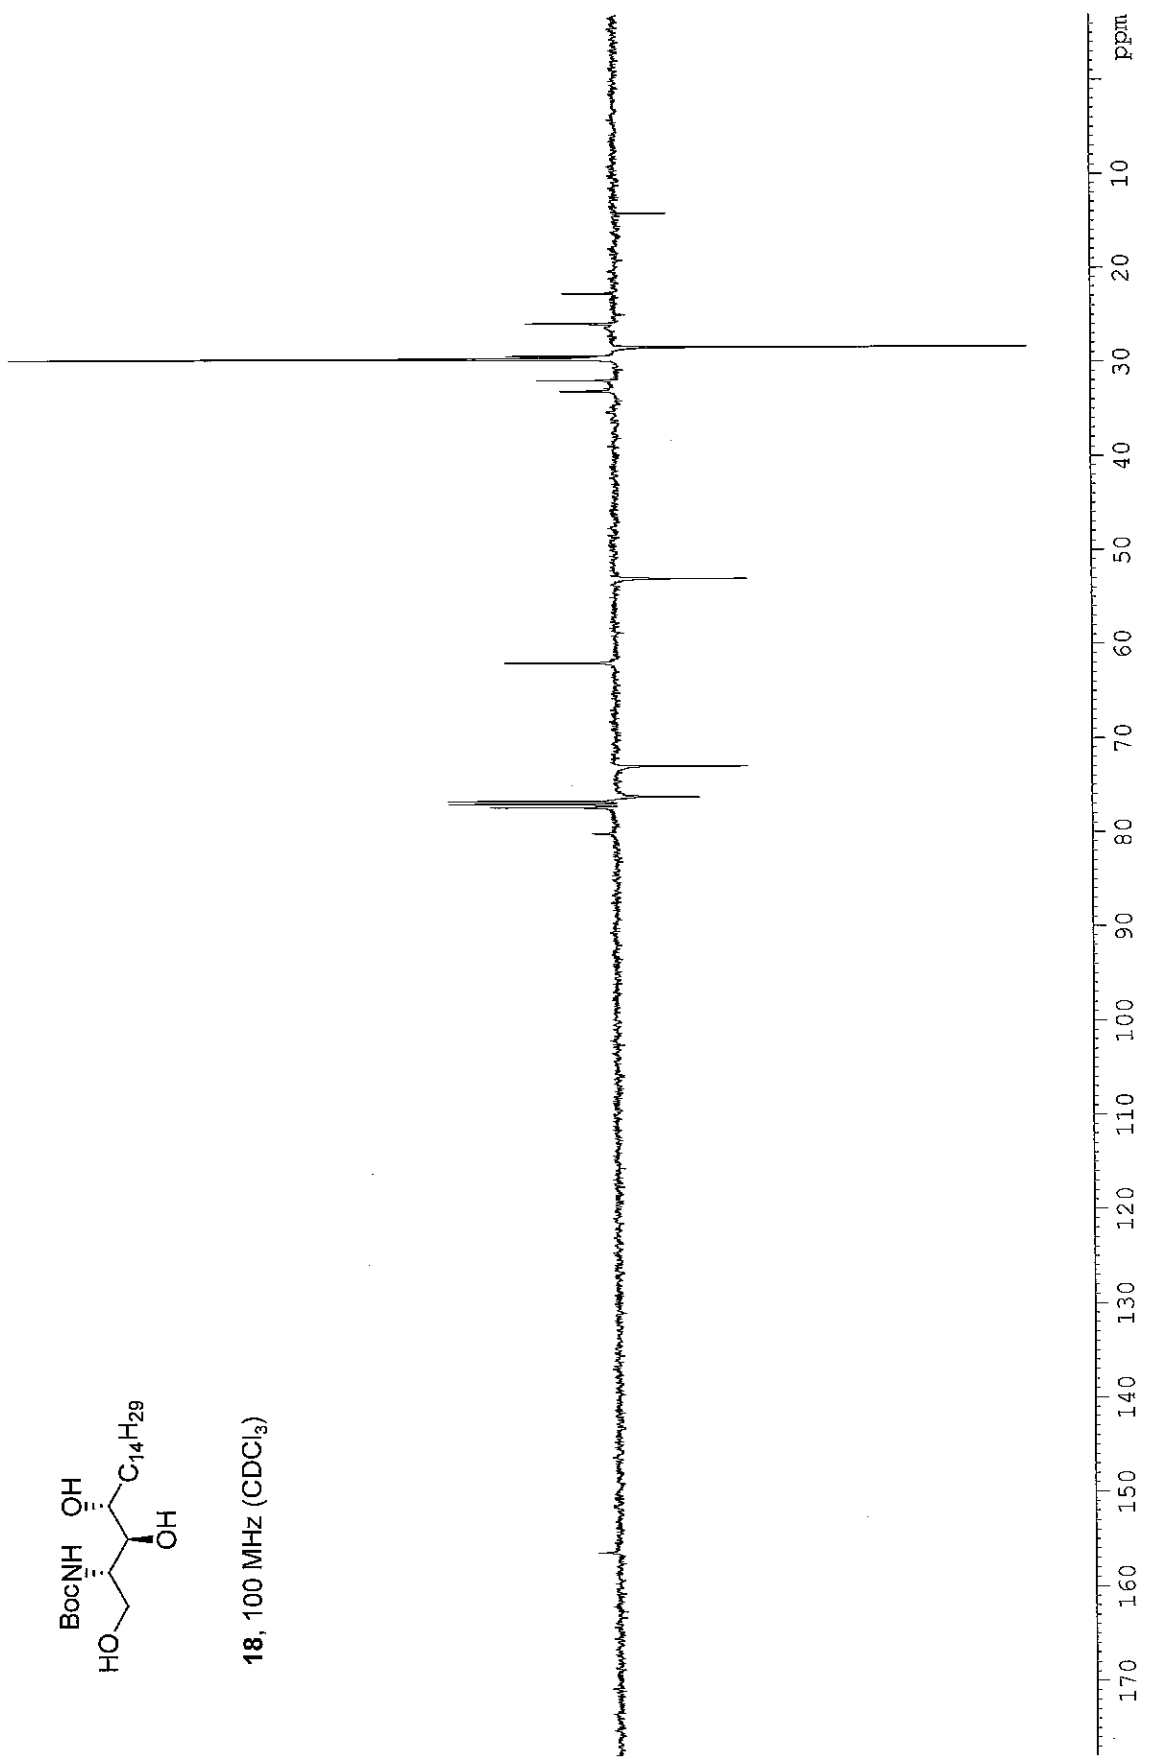





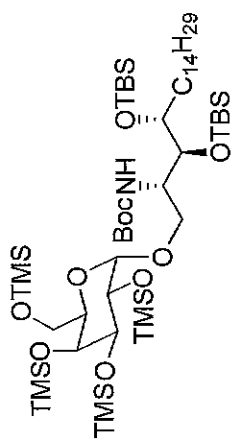

20, 300 MHz (CDCl<sub>3</sub>)

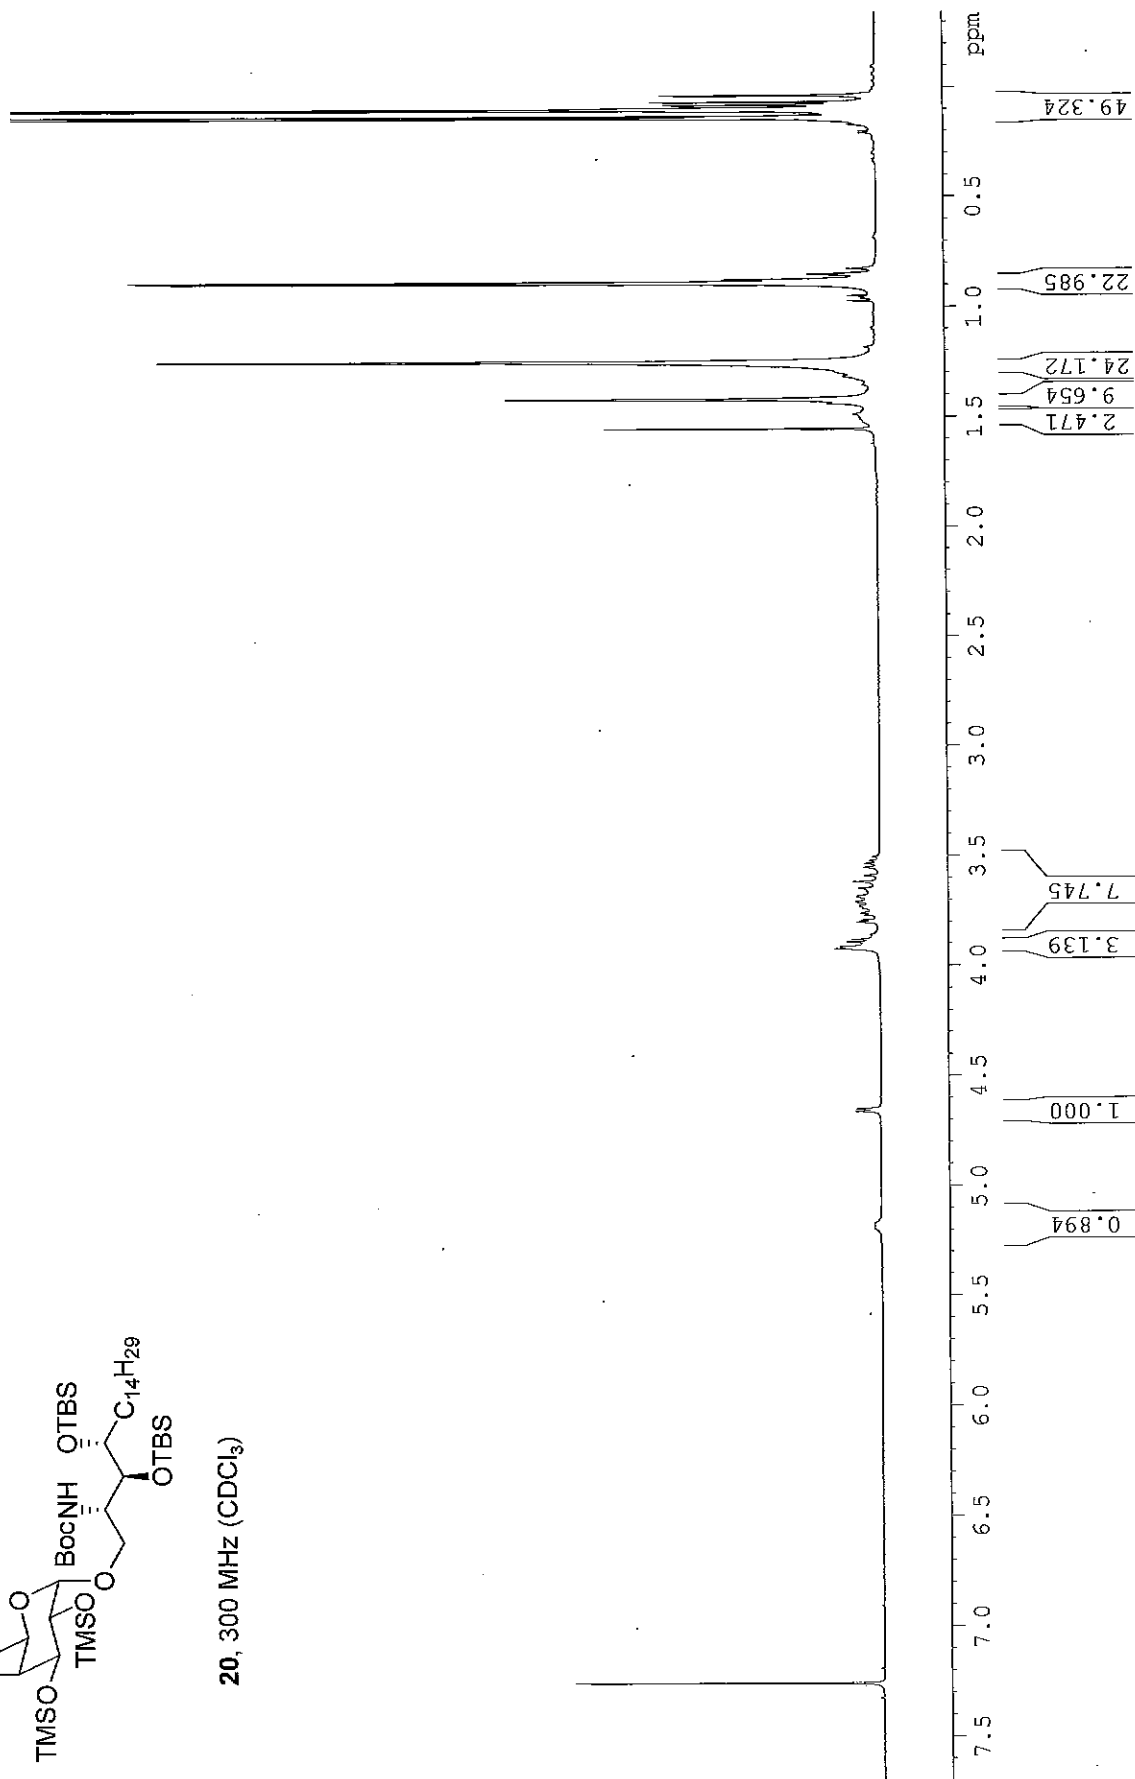



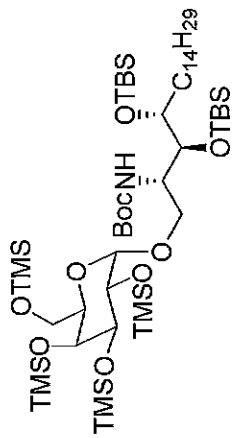

20, 100 MHz (CDCl<sub>3</sub>)

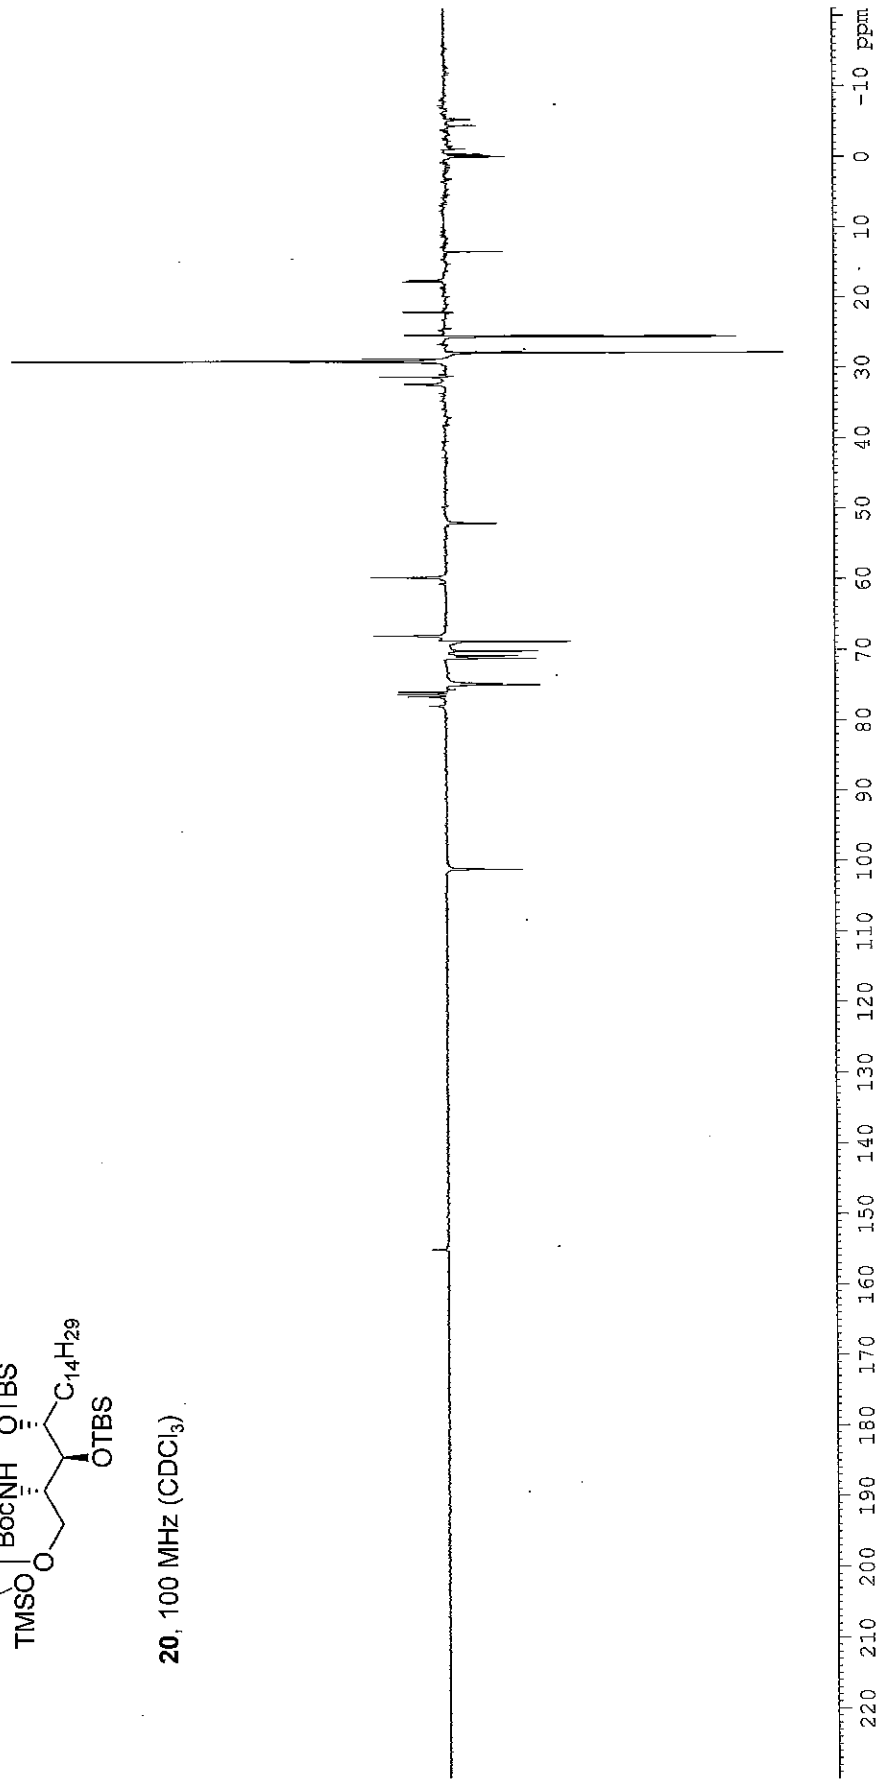

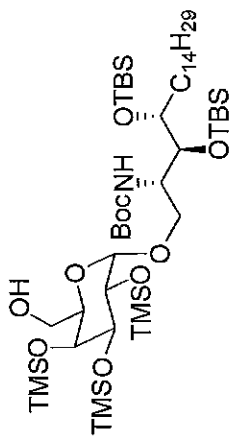

21, 300 MHz (CDCl<sub>3</sub>)

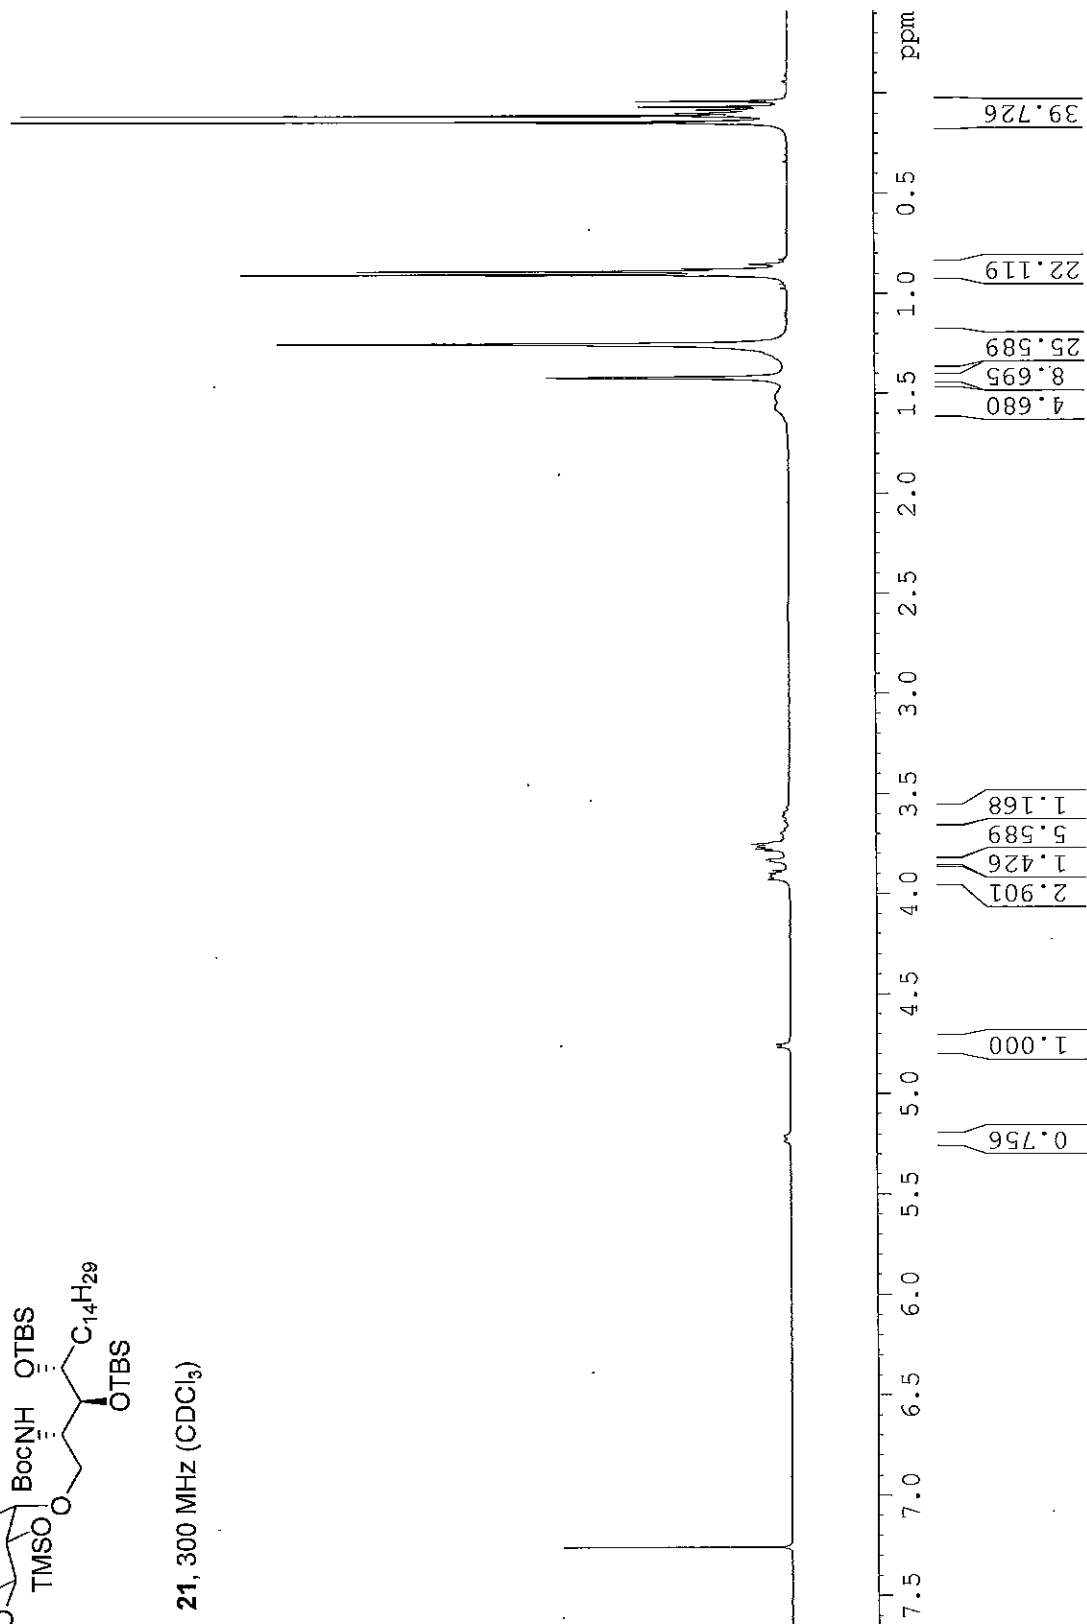

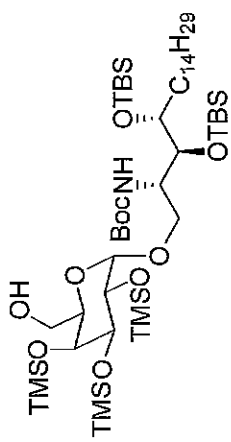

21, 100 MHz (CDCl<sub>3</sub>)

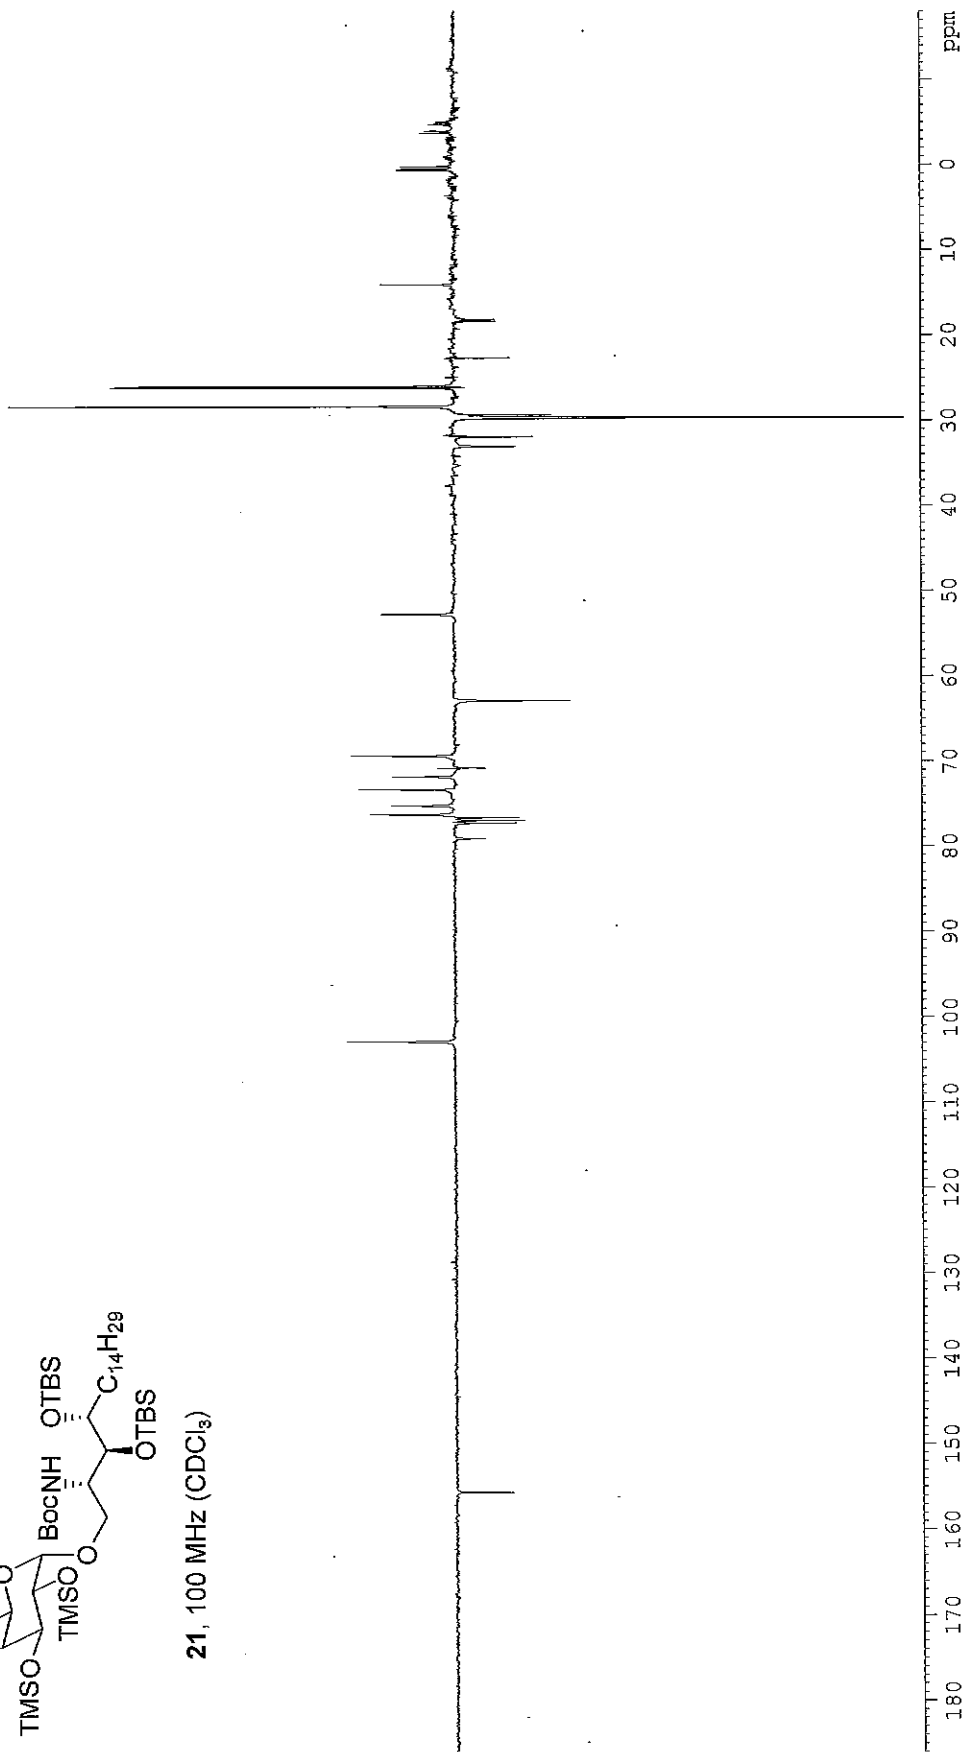

835

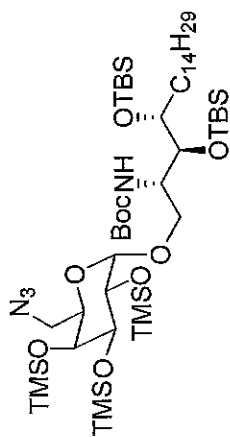

22, 300 MHz (CDCl<sub>3</sub>)

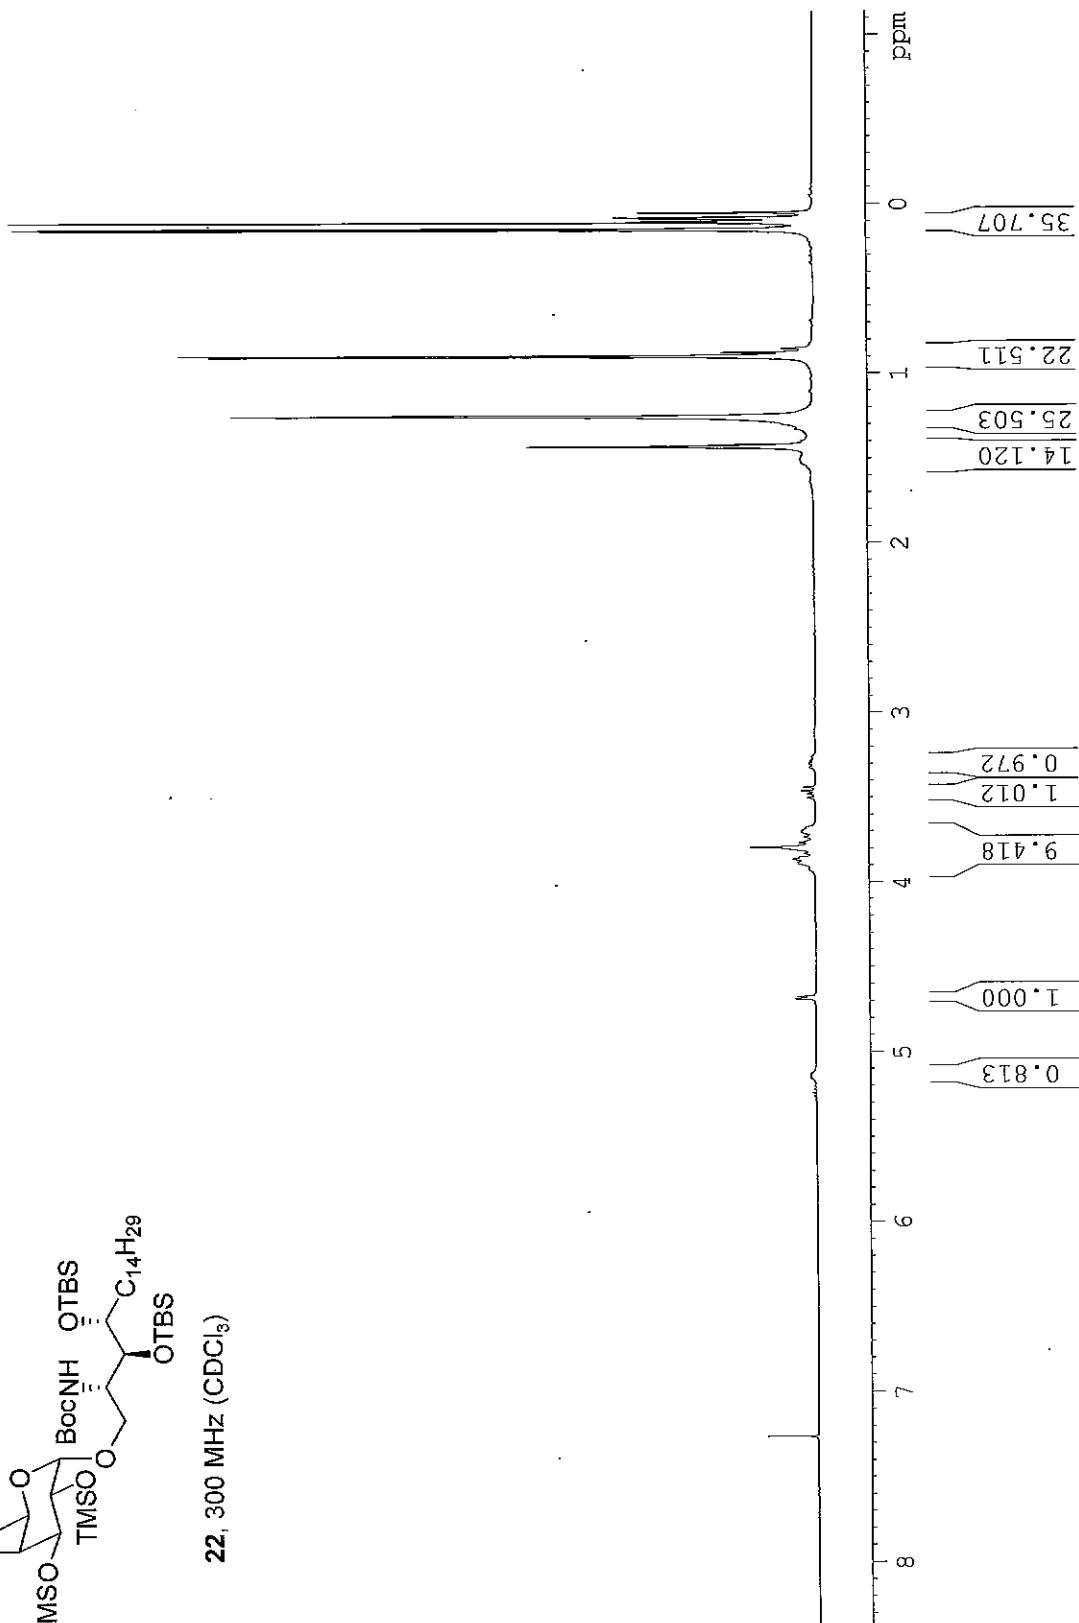

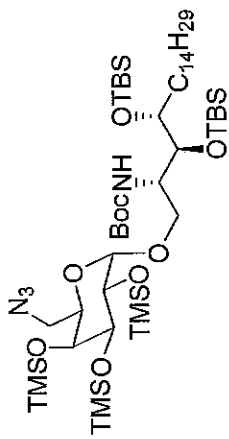

22, 100 MHz ( $CDCl_3$ )

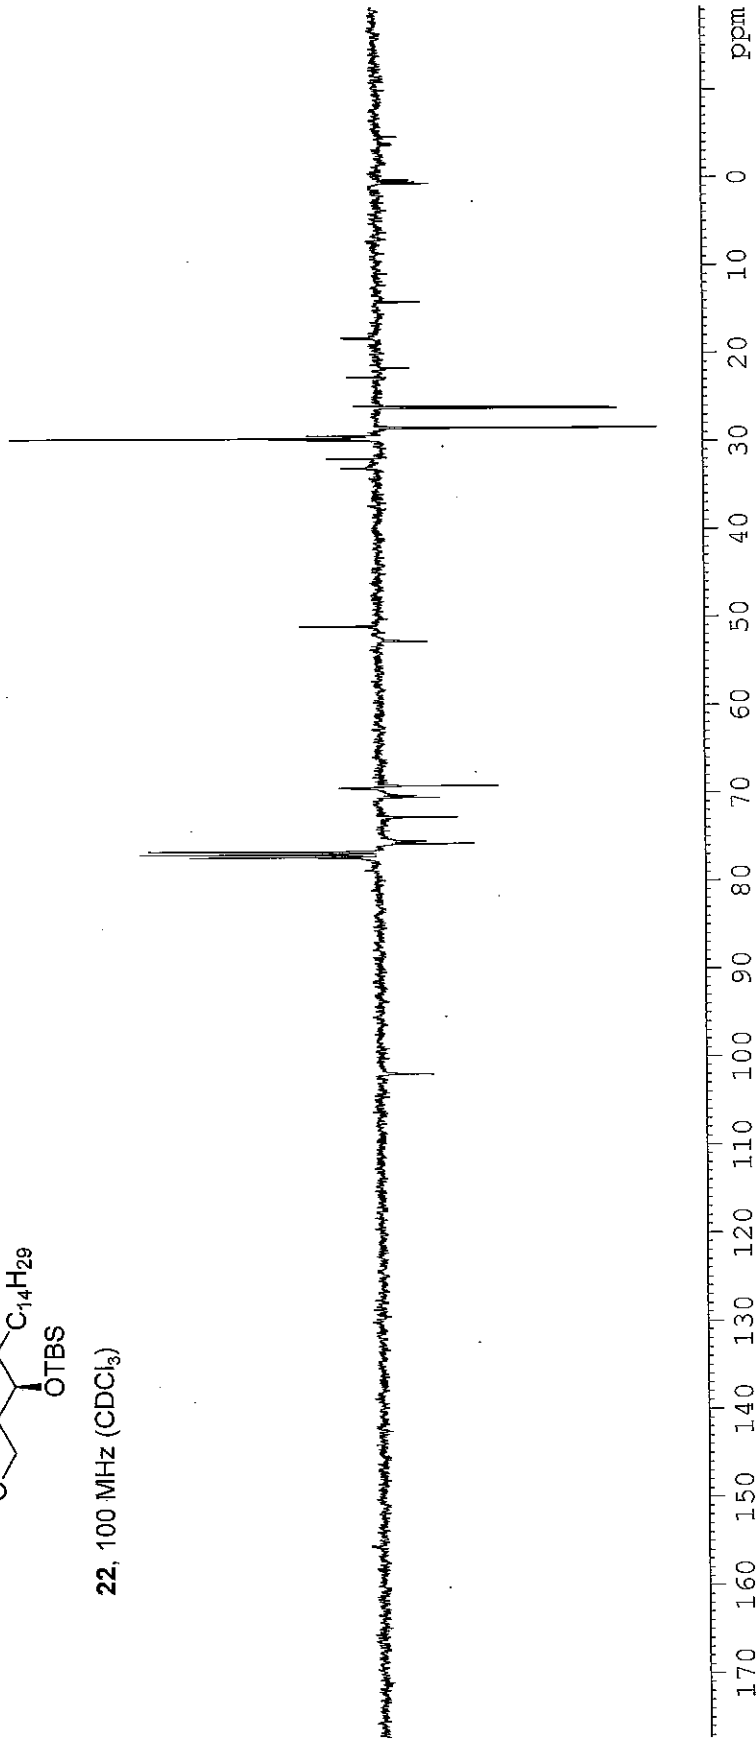

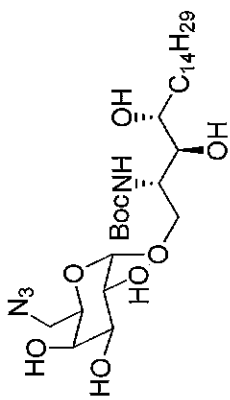

9, 300 MHz (2:1 CDCl<sub>3</sub>:CD<sub>3</sub>OD)

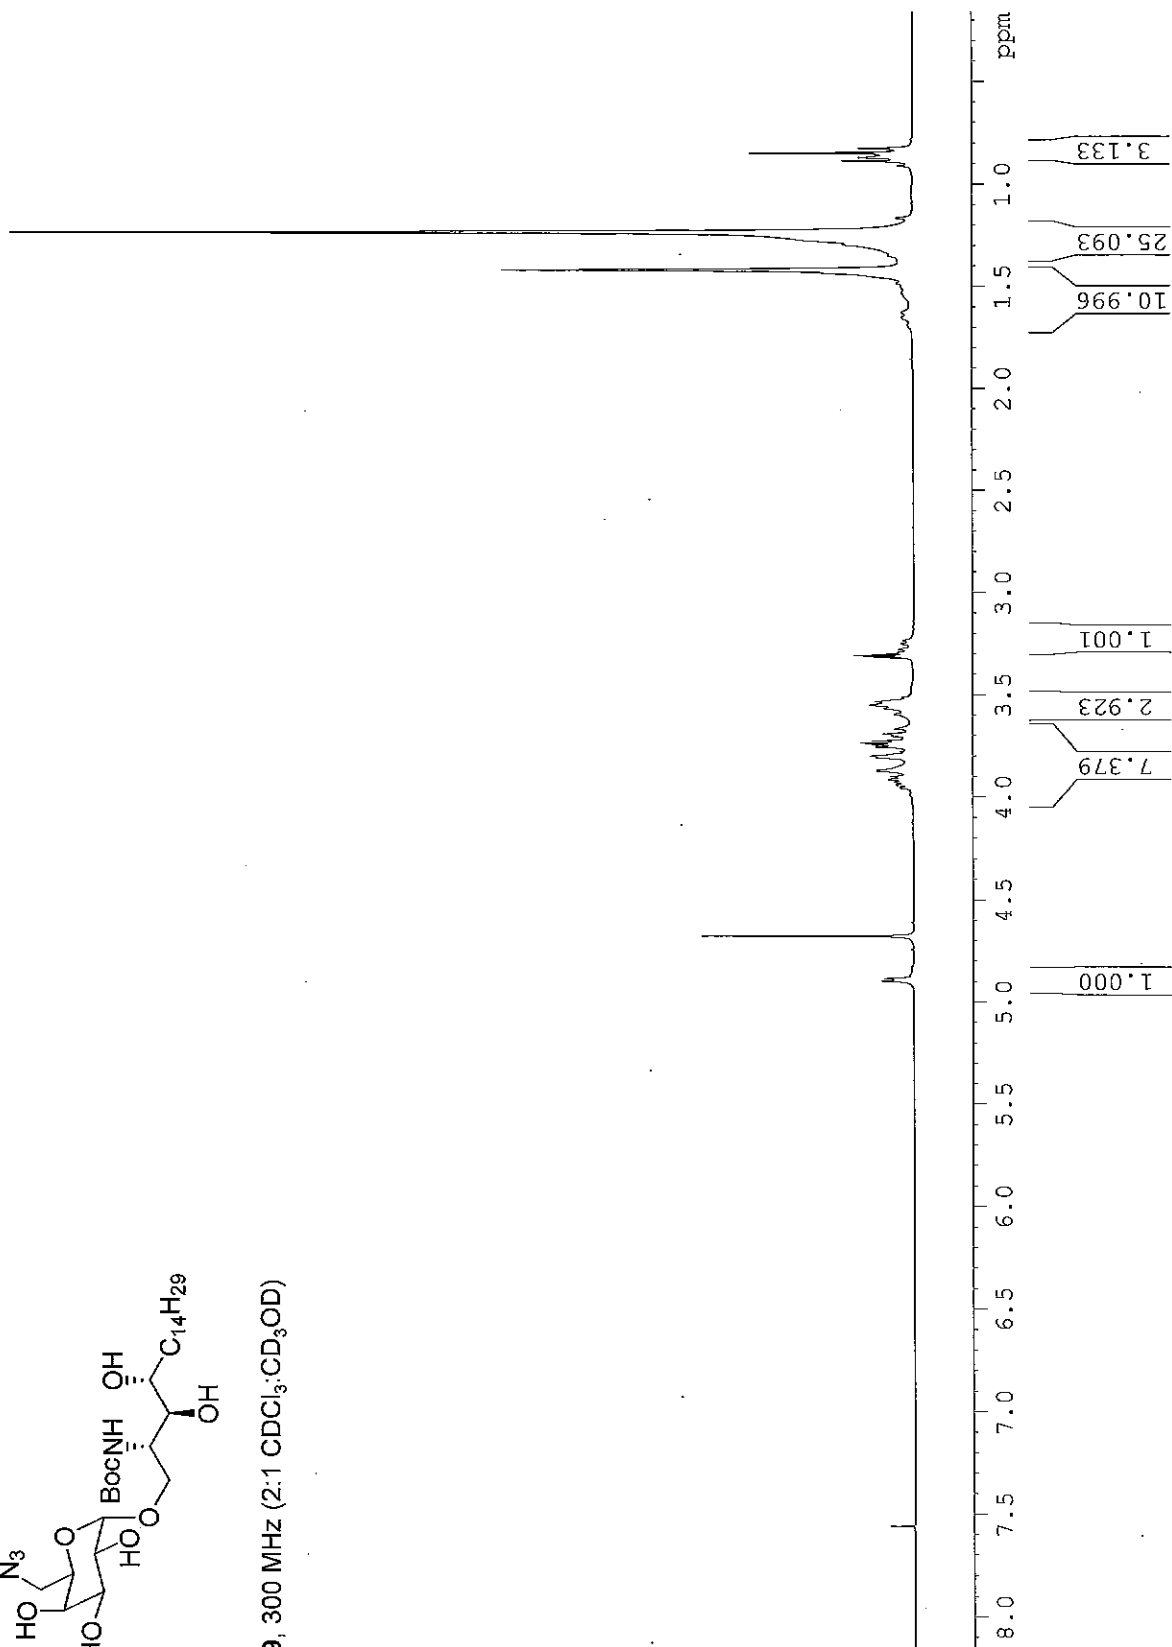



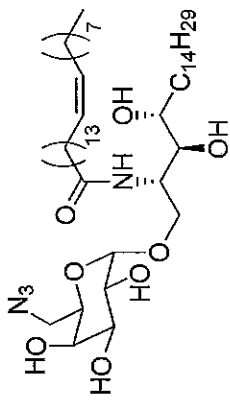

23, 400 MHz (2:1 CDCl<sub>3</sub>:CD<sub>3</sub>OD)

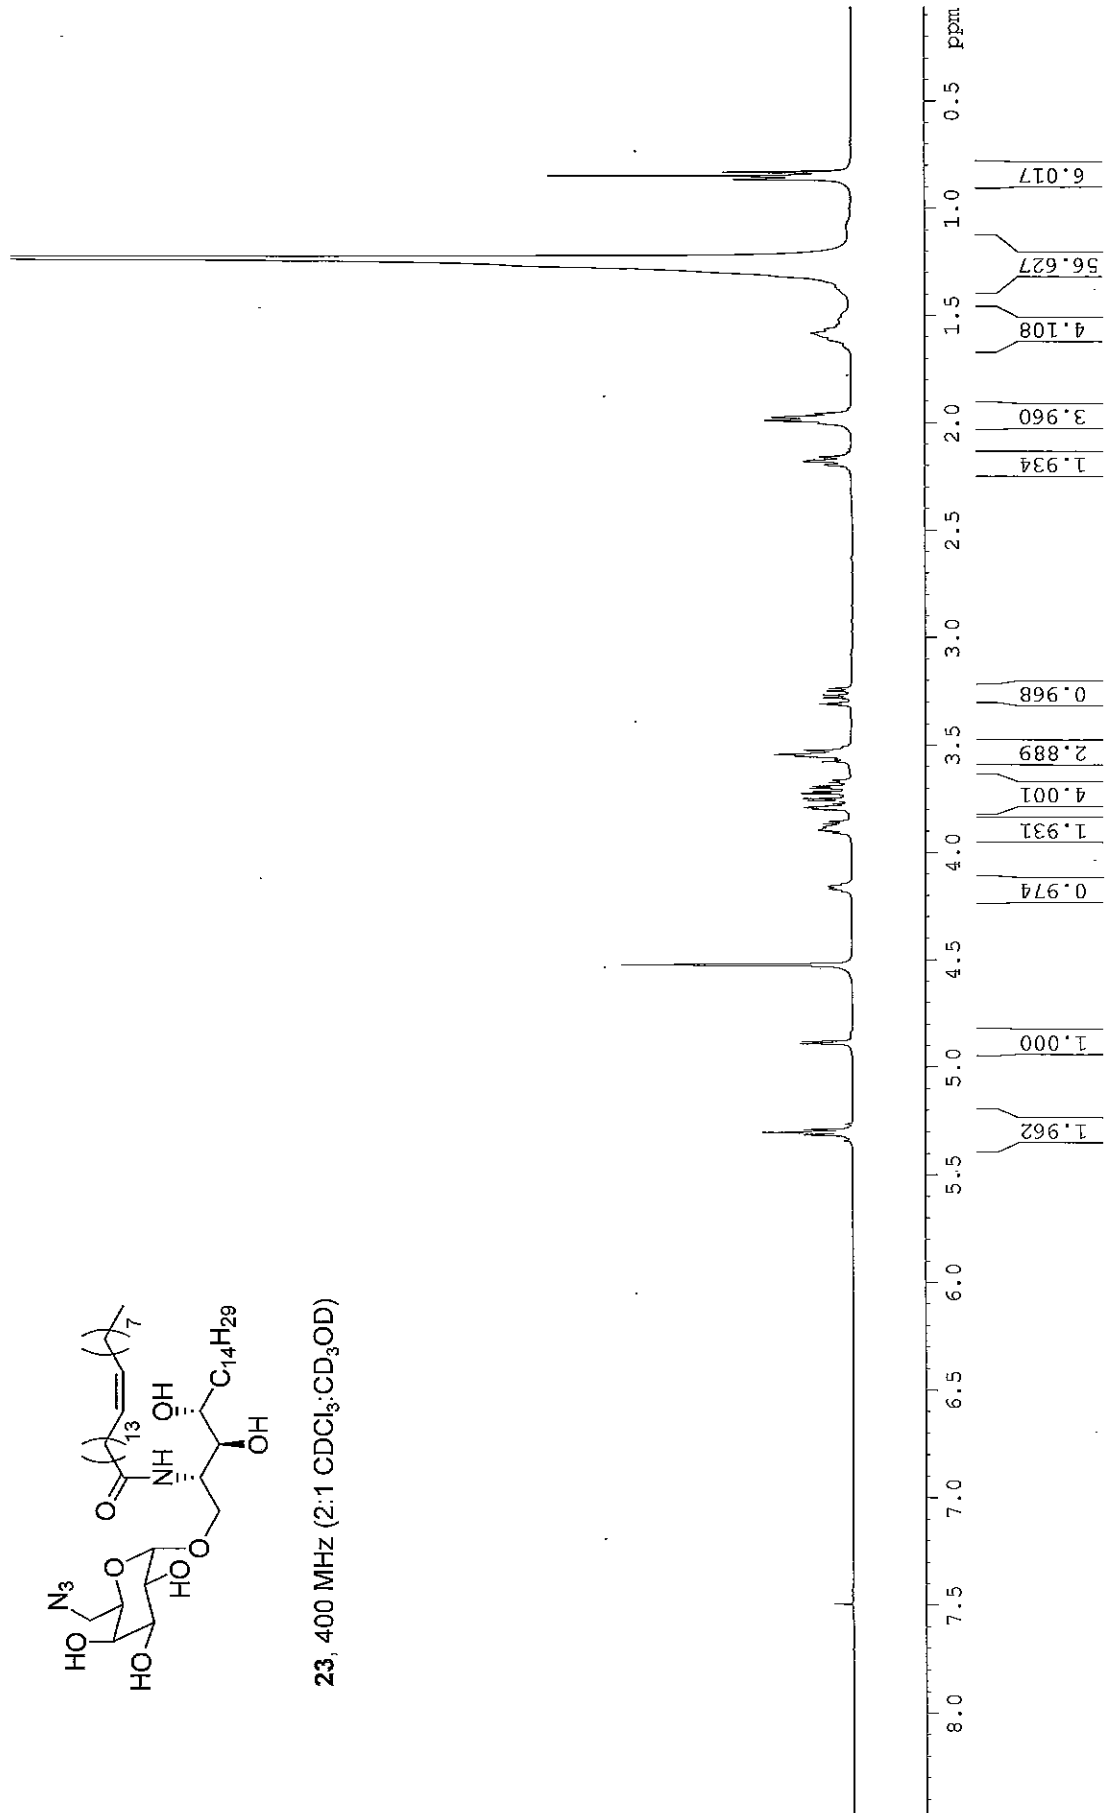



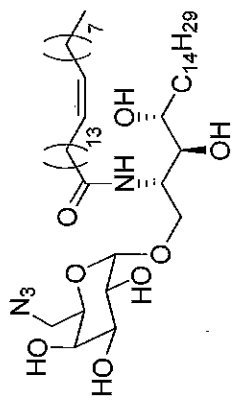

23, 100 MHz (2:1 CDCl<sub>3</sub>:CD<sub>3</sub>OD)

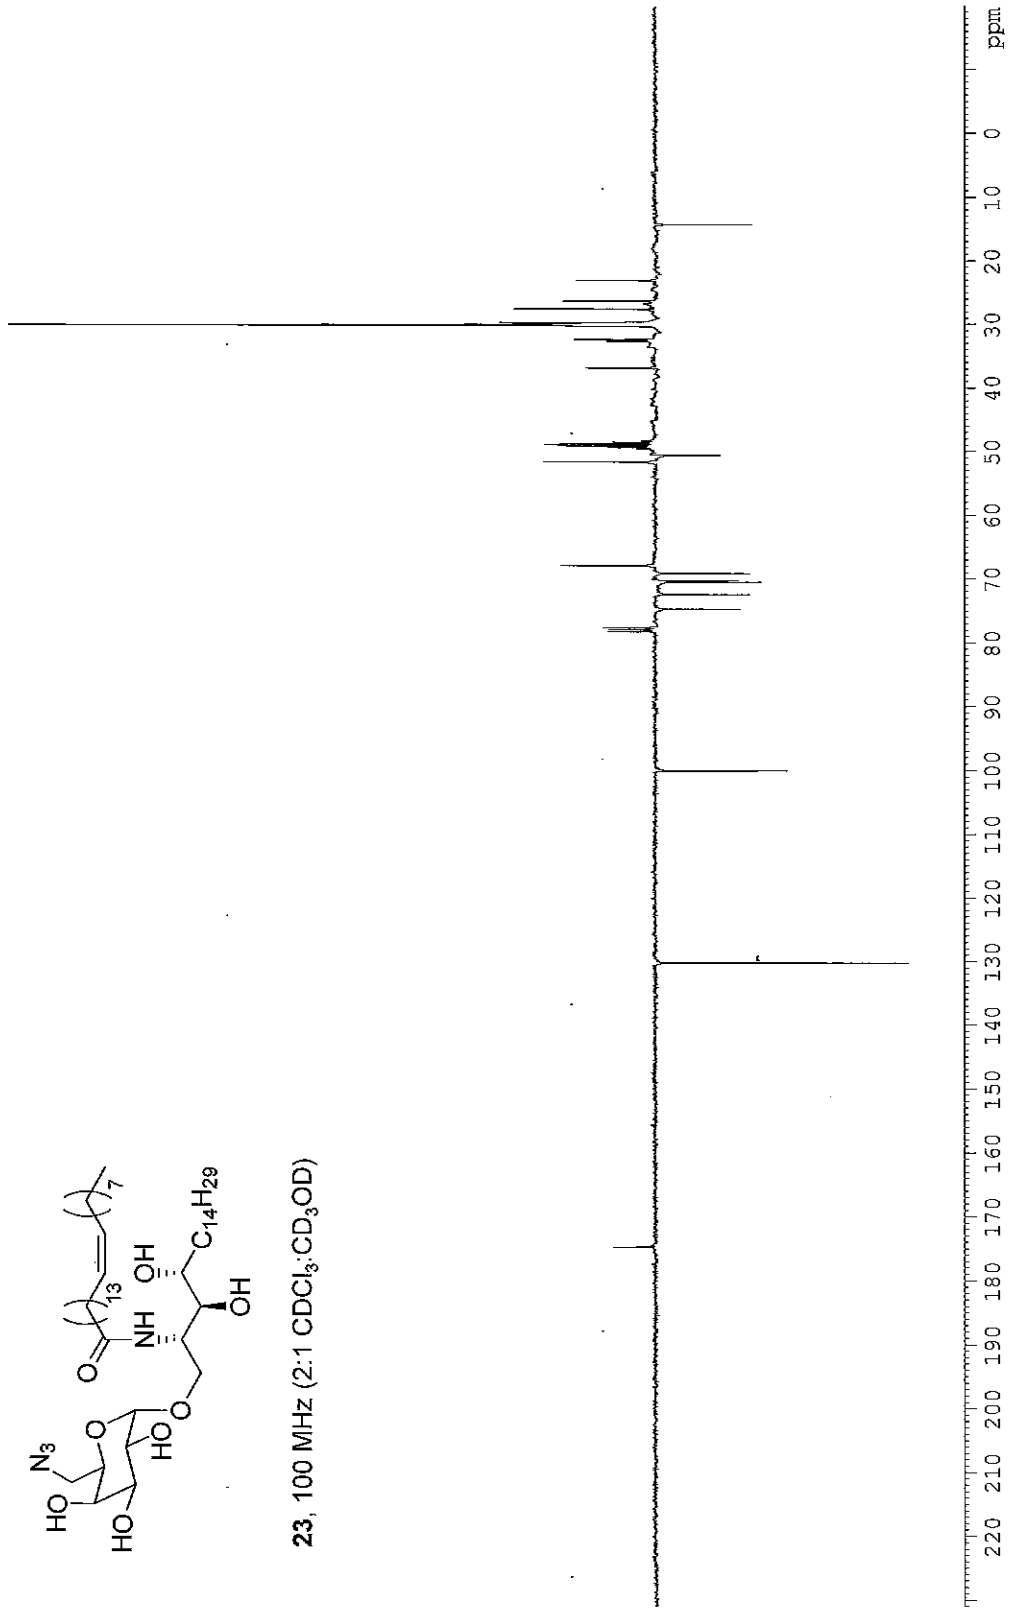

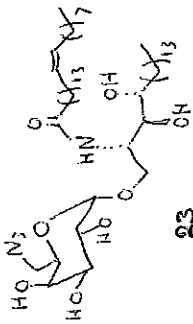

221

```

NAME 03-16-Bestra-1
EXPNO 11
PROCNO 1
Date_ 20100316
Time 9.40
INSTRUM spect
PROBHD 5 mm PADUL 13C
PULPROG cossyprmtfq
TD 1024
SOLVENT MeOD
NS 4
DS 16
SWH 2905.977 Hz
FIDRES 1.2338645 Hz
AQ 0.166700 sec
RG 320
DIV 172.000 usec
DE 6.50 usec
TE 296.4 K
D0 0.00000300 sec
D1 1.40661001 sec
D13 0.00000400 sec
D16 0.00020000 sec
IN0 0.00034400 sec

===== CHANNEL f1 =====
NUC1 1H
P1 9.50 usec
PL1 -4.00 dB
PL1W 24.2918967 W
SFO1 400.1309503 MHz

===== GRADIENT CHANNEL =====
GPNAM1 SINE 100
GPNAM2 SINE 100
GPNAM3 SINE 100
GPZ1 16.00 %
GPZ2 12.00 %
GPZ3 40.00 %
P16 1000.00 usec
ND0 1
TD 256
SFO1 400.131 MHz
FIDRES 11.355378 Hz
SW 7.265 ppm
FMODE QF
SI 1024
SFO1 400.130269 MHz
VDW 0
SFB 0
LB 0
GB 0
PC 140
SI 512
MC2 QF
SF 400.1300268 MHz
WDW 0
SSB 0
LB 0
GB 0
  
```

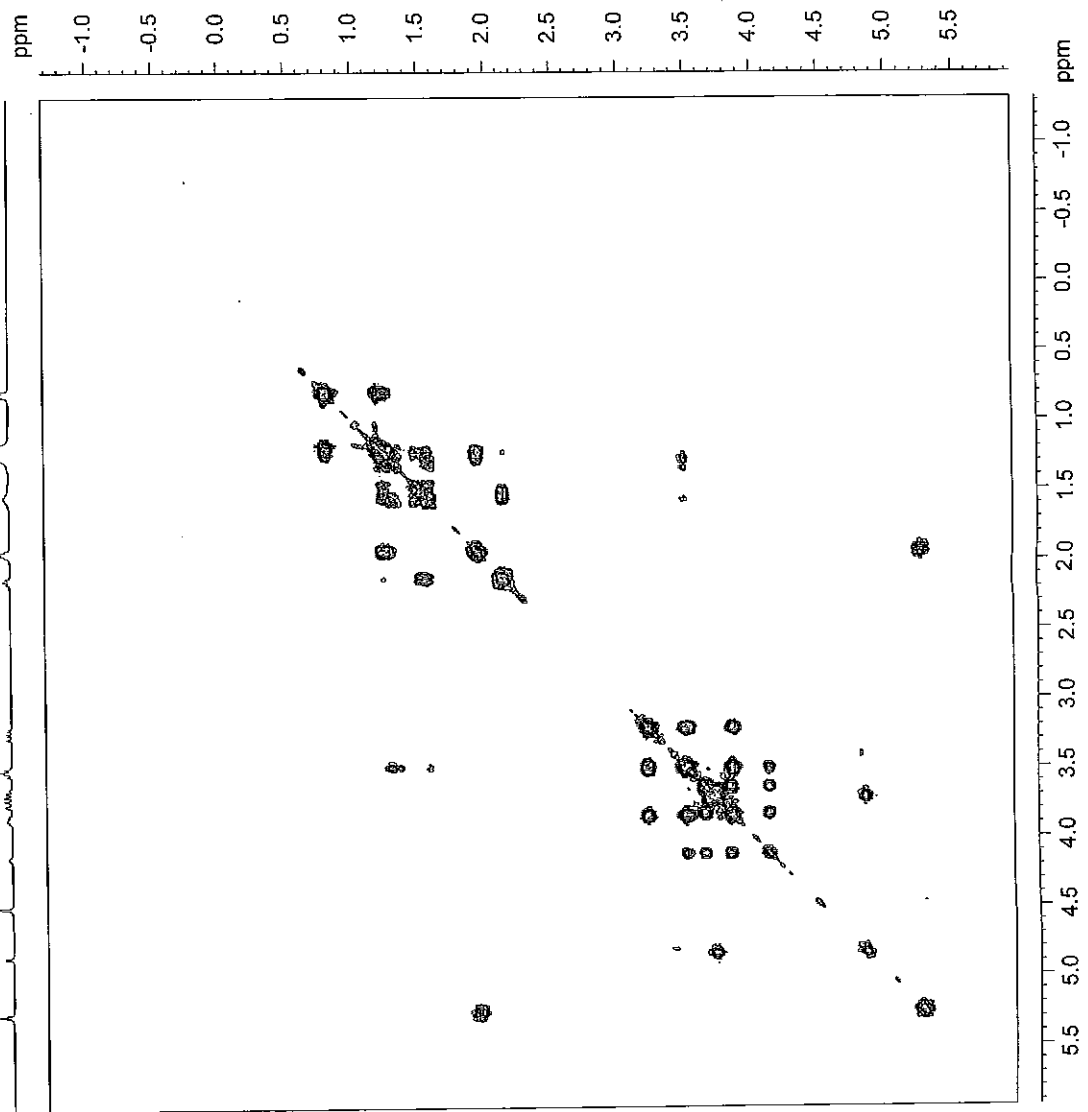



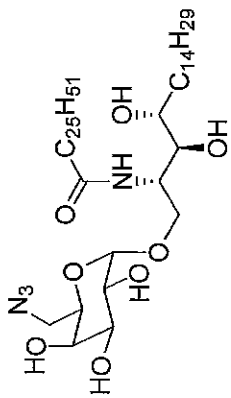

24, 400 MHz (2:1 CDCl<sub>3</sub>:CD<sub>3</sub>OD)

544

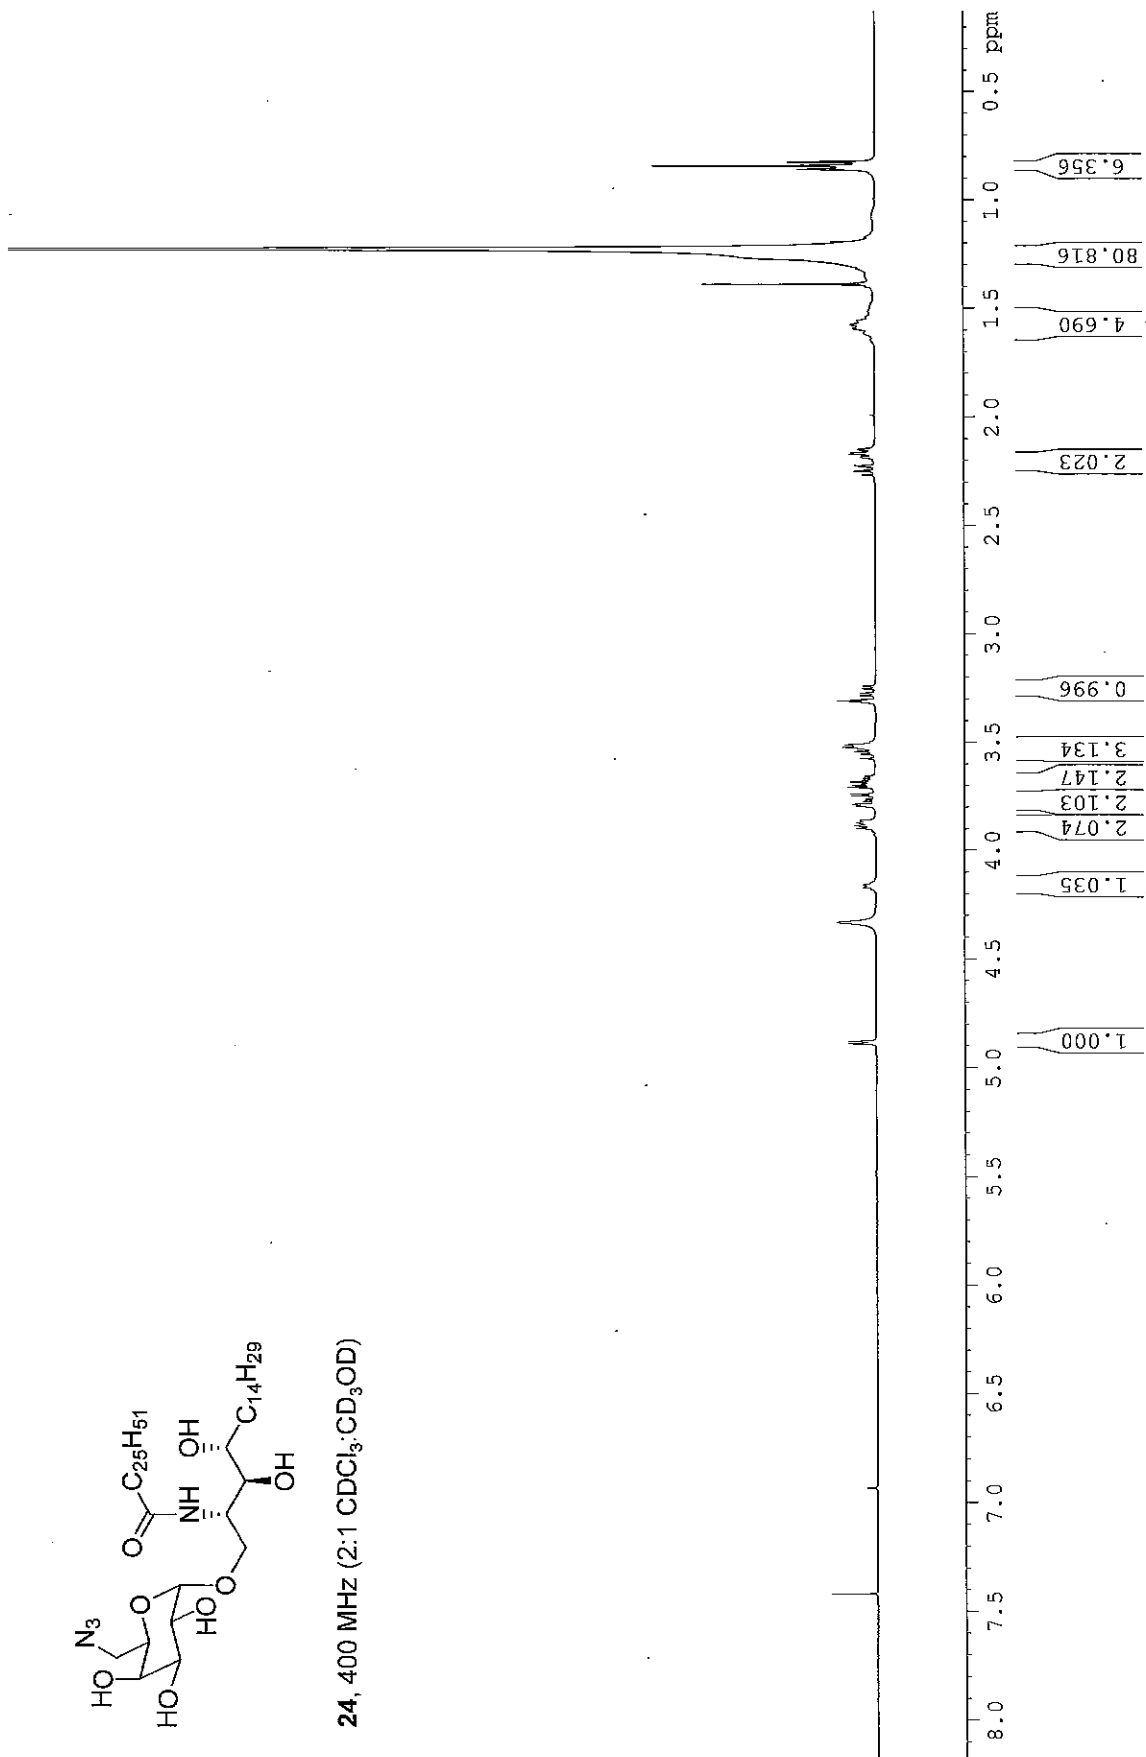

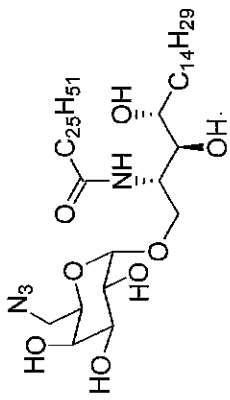

24, 400 MHz (2:1 CDCl<sub>3</sub>:CD<sub>3</sub>OD)

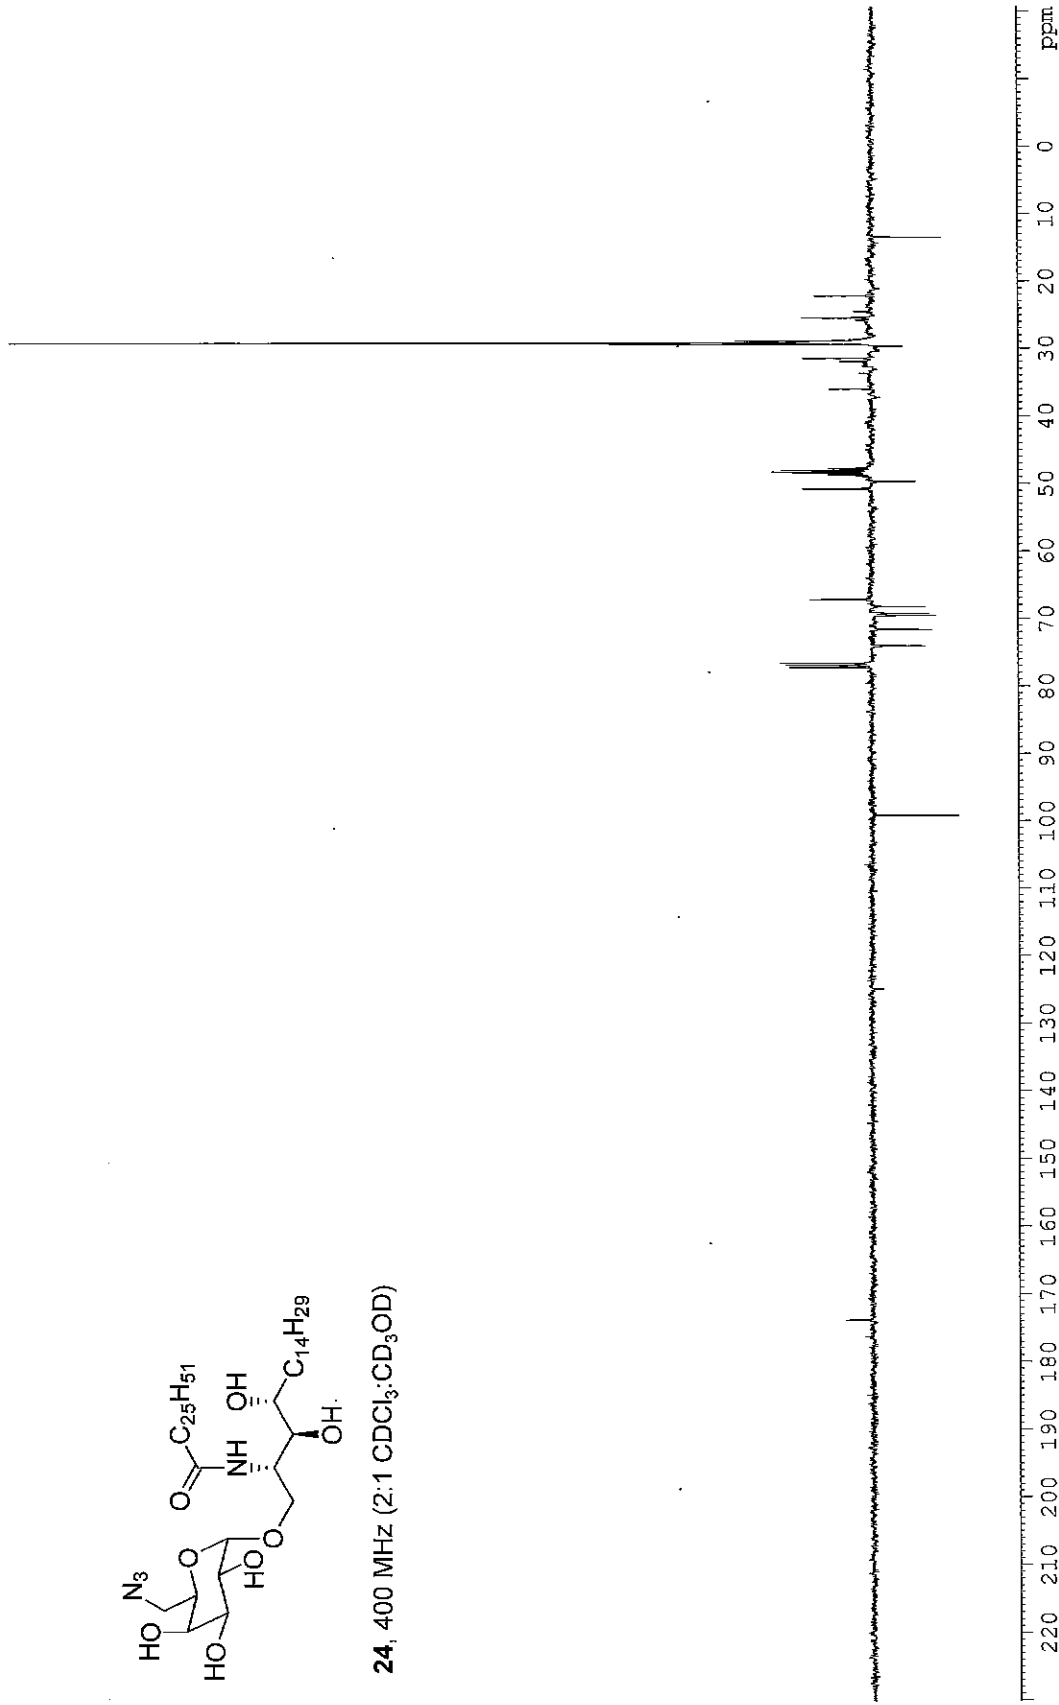

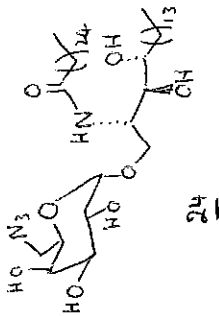

NAME 03-30-Bestra-4  
 EXPNO 11  
 PROCNO 1  
 Date\_ 20100330  
 Time 12.53  
 INSTRUM spect  
 PROBHD 5 mm PADUL 13C  
 PULPROG cosygm1qf  
 TD 1024  
 SOLVENT MeOD  
 NS 4  
 DS 1  
 SWH 188.427 Hz  
 FIDRES 1.837624 Hz  
 AQ 0.2580980 sec  
 RG 2050  
 DW 252.000 usec  
 DE 6.50 usec  
 TE 296.3 K  
 D0 0.00000000 sec  
 D1 1.32468998 sec  
 D13 0.00000400 sec  
 D16 0.00020000 sec  
 INO 0.00050400 sec

===== CHANNEL f1 =====  
 NUC1 1H  
 P1 9.50 usec  
 PL1 2.00 dB  
 PLW 24.315987 W  
 SFO1 400.1311255 MHz

===== GRADIENT CHANNEL =====  
 GPNAM1 SINE 100  
 GPNAM2 SINE 100  
 GPNAM3 SINE 100  
 GPZ1 16.00 %  
 GPZ2 12.00 %  
 GPZ3 40.00 %  
 P16 1000.00 usec  
 ND0 1  
 TD 256  
 SFO1 400.1311 MHz  
 FIDRES 7.750466 Hz  
 SW 4.959 ppm  
 LRMODE 1024 CF  
 SF 400.1300248 MHz  
 VMDW 0  
 SSB 0  
 LB 0.00 Hz  
 GB 0  
 PC 1.40  
 SI 512  
 MC2 QF  
 SF 400.1300248 MHz  
 WDW SINE  
 SSB 0  
 LB 0.00 Hz  
 GB 0

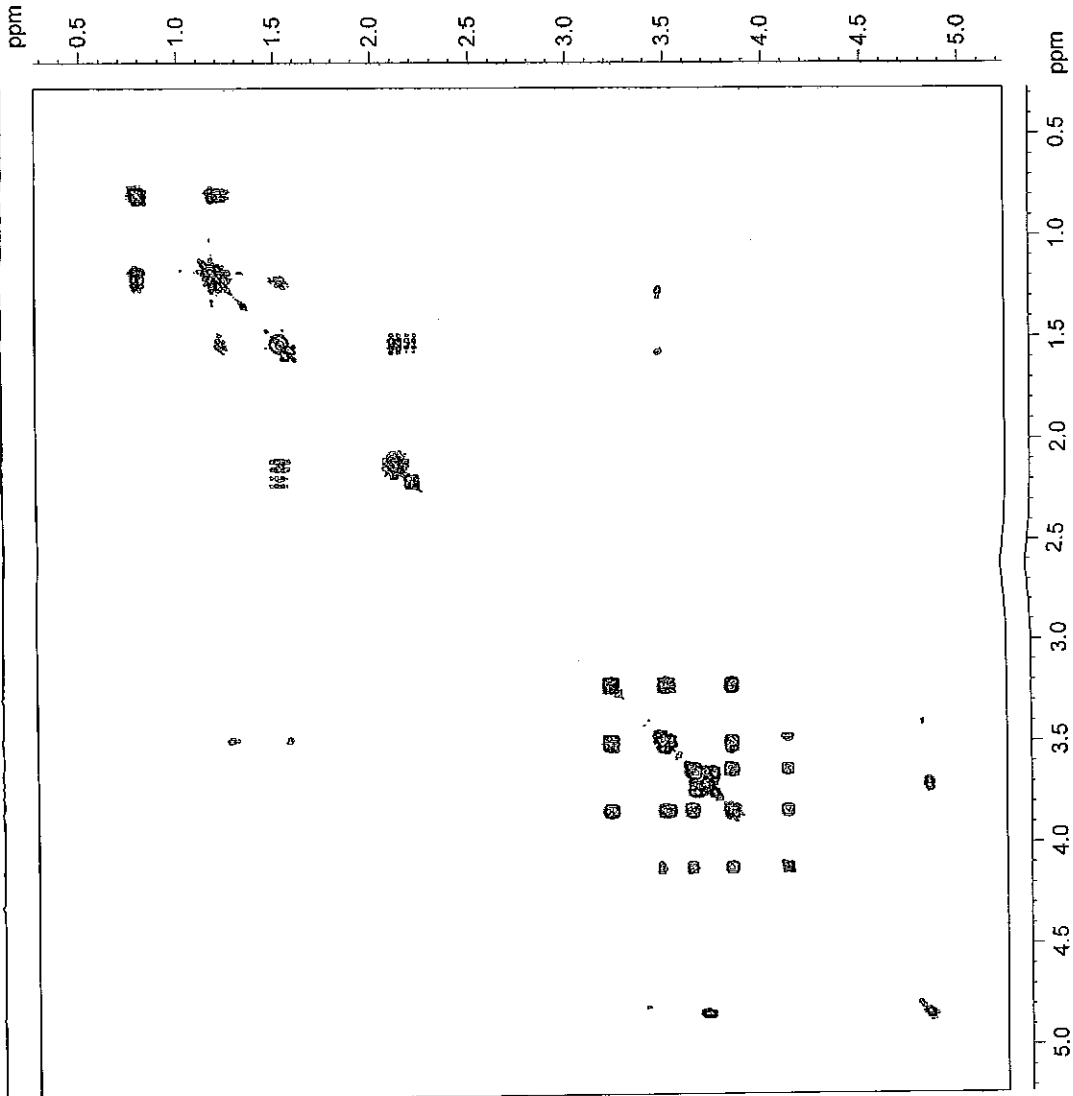







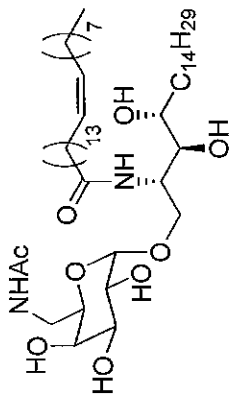

6, 400 MHz (2:1 CDCl<sub>3</sub>:CD<sub>3</sub>OD)

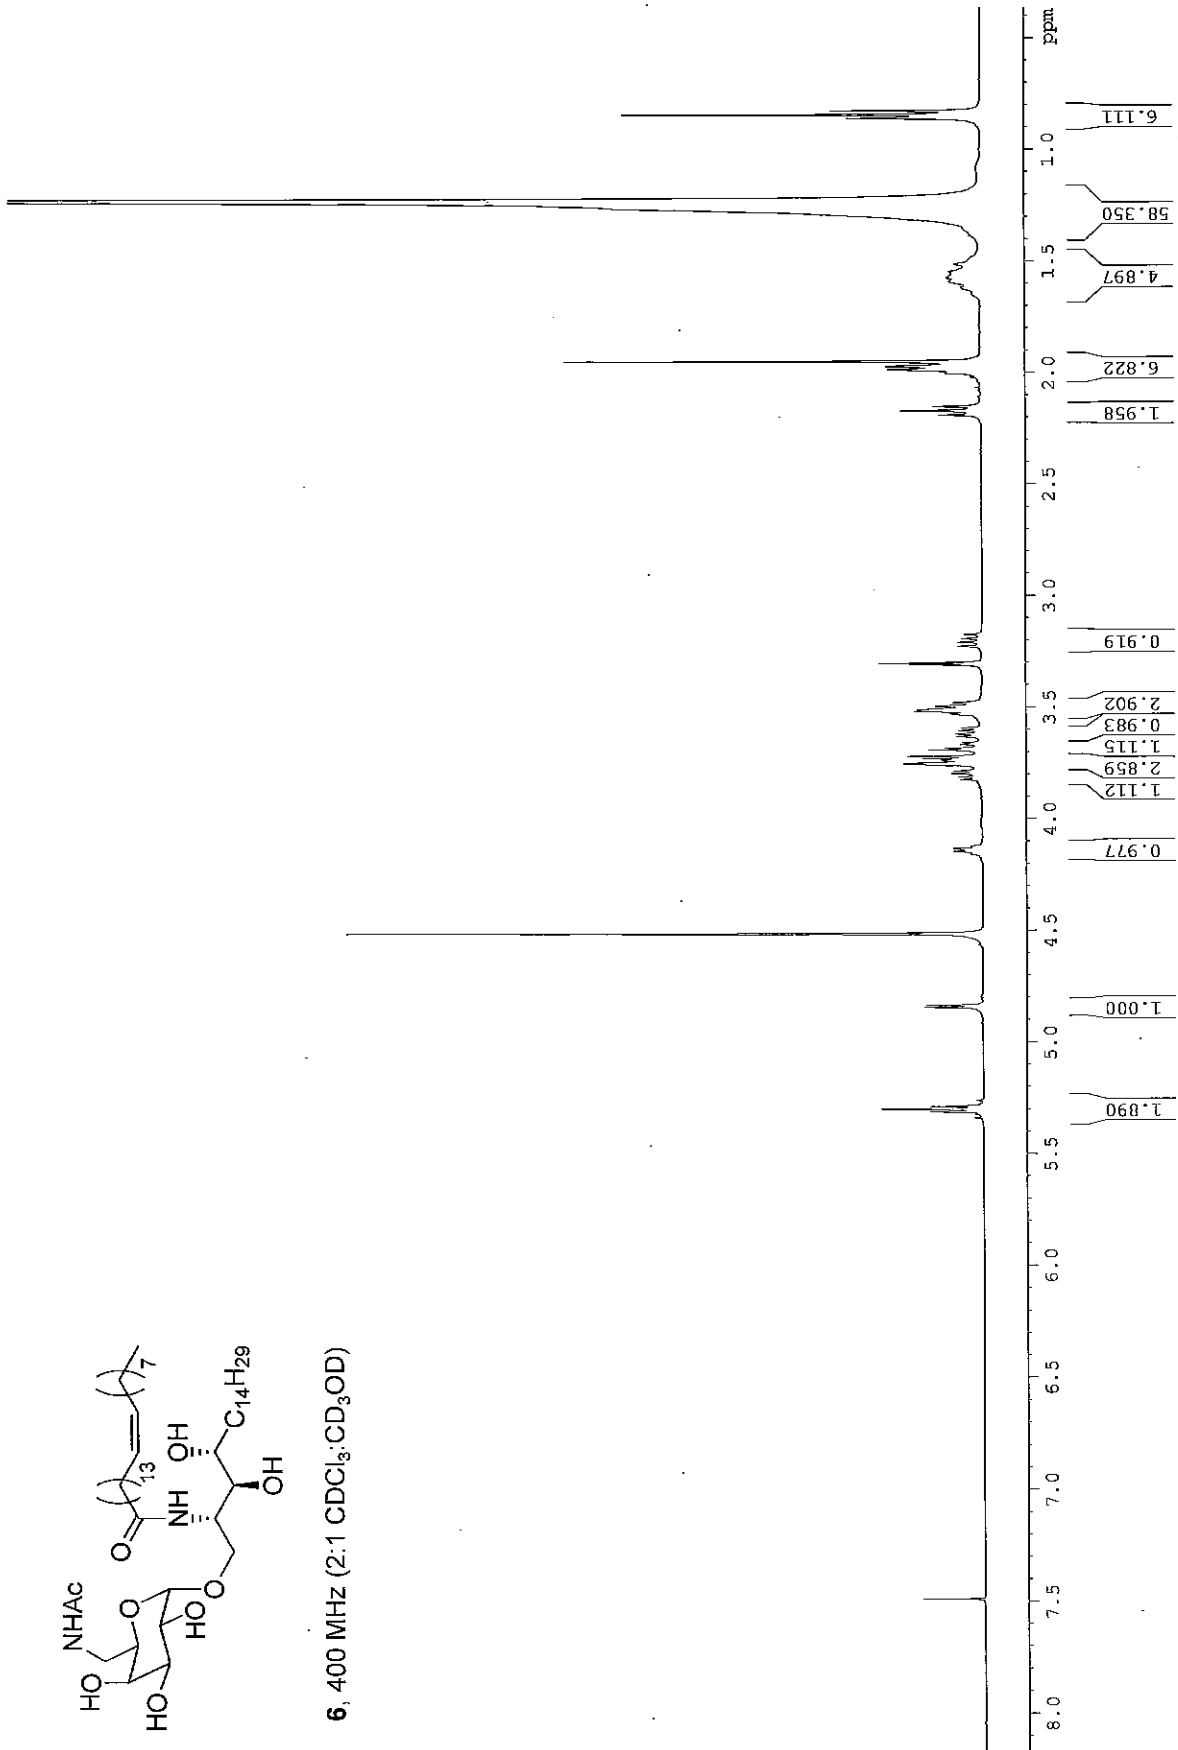

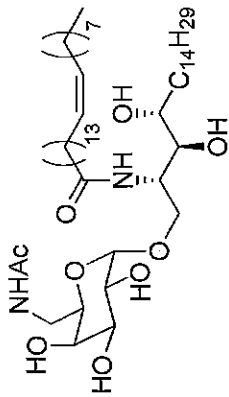

6, 100 MHz (2:1 CDCl<sub>3</sub>:CD<sub>3</sub>OD)

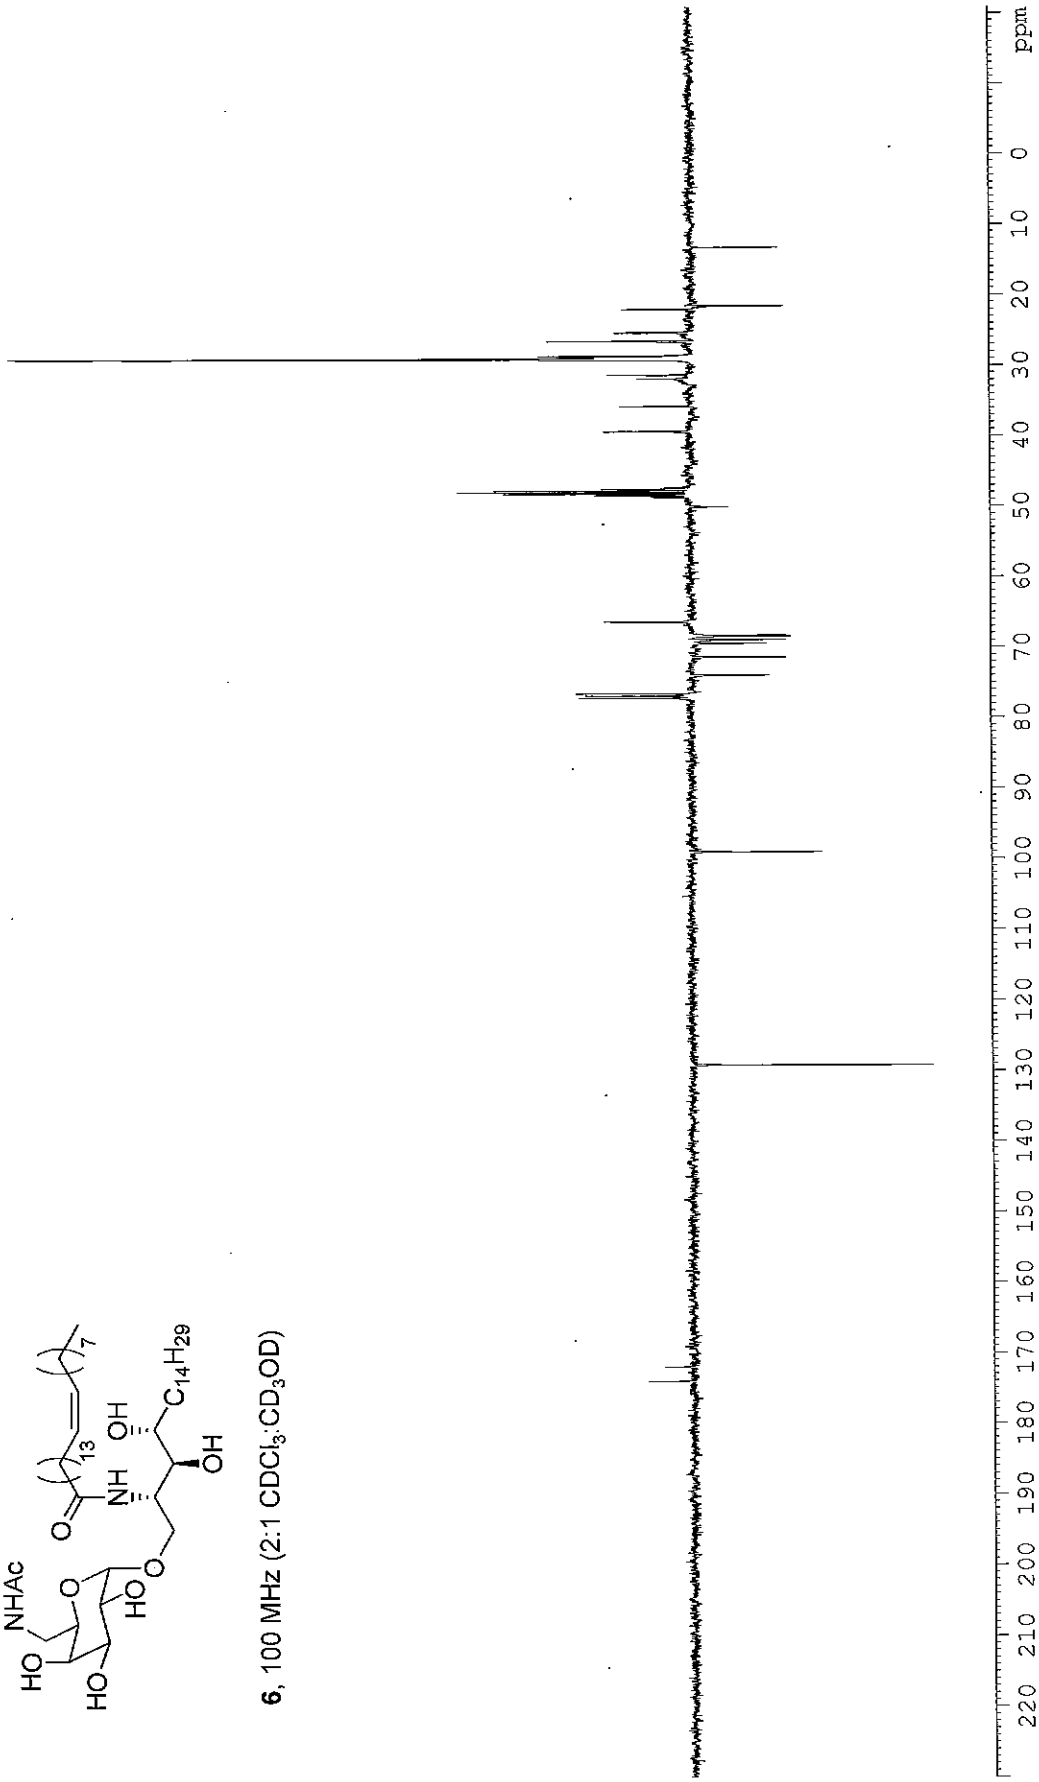

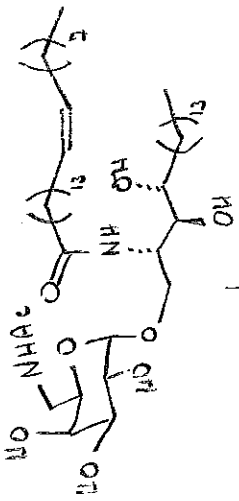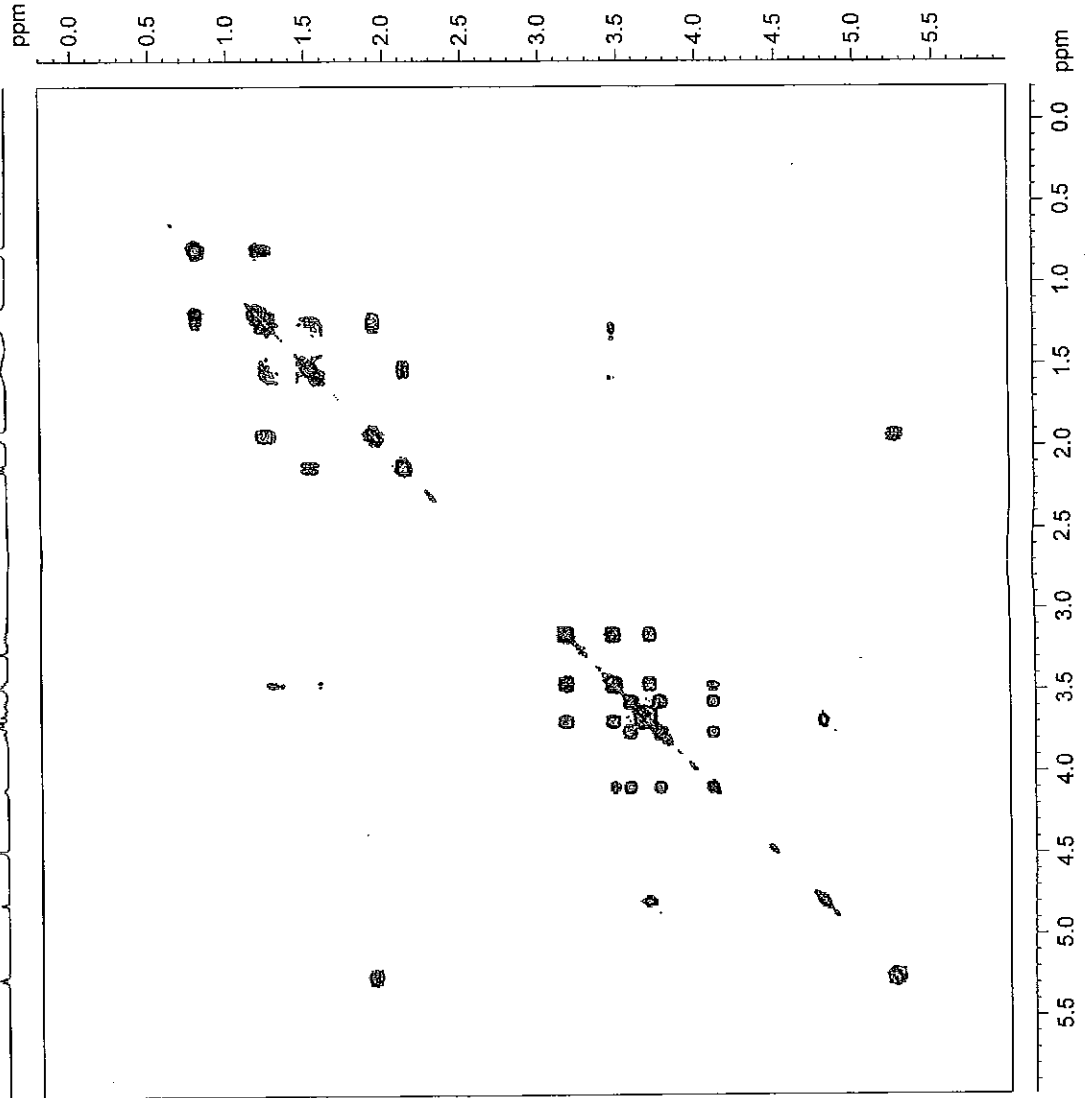

```

NAME 03-18-Besra-1
EXPNO 11
PROCNO 1
Date_ 20100318
Time 9.16
INSTRUM spect
PROBHD 5 mm PADUL 13C
PULPROG zgpg30m1qf
SOLVENT MeOD
NS 4
DS 16
SWH 2475.248 Hz
FIDRES 2.417234 Hz
AQ 0.2059580 sec
RG 2050
DW 202.000 usec
DE 6.50 usec
TE 298.4 K
D0 0.00000300 sec
D1 1.37589002 sec
D13 0.00000400 sec
D16 0.00020000 sec
IND 0.00040400 sec
===== CHANNEL f1 =====
NUC1 13
P1 9.50 usec
PL1 -1.00 dB
PL1W 24.23185867 W
SFO1 400.1311815 MHz
===== GRADIENT CHANNEL =====
GPNAM1 SINE:100
GPNAM2 SINE:100
GPNAM3 SINE:100
GPZ1 16.00 %
GPZ2 12.00 %
GPZ3 40.00 %
P16 1000.00 usec
NU0 255
SFO1 400.1312 MHz
FIDRES 9.668336 Hz
SIV 6.186 ppm
FRMODE QF
SI 1024
SF 400.1300267 MHz
WDW SINE
SSB 0
LB 0.00 Hz
GB 0
PC 1.40
SI 512
MC2 QF
SF 400.1300267 MHz
WDW SINE
SSB 0
LB 0.00 Hz
GB 0
    
```

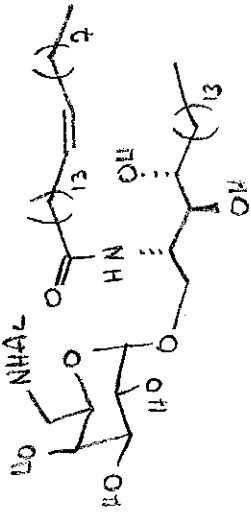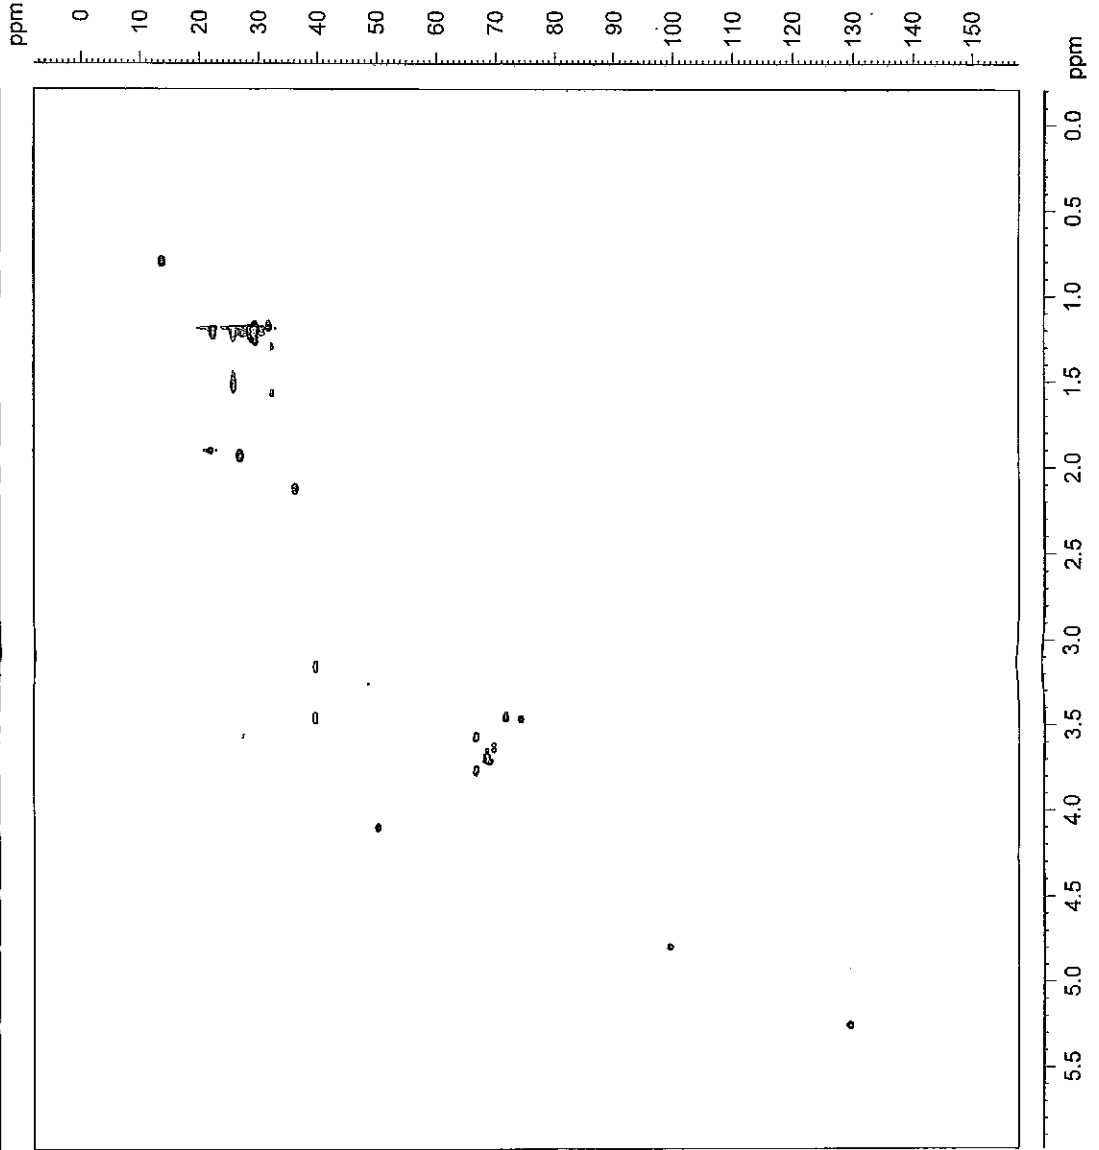

```

NAME 03-18-88gr-1
EXPNO 13
PROCNO 1
Date_ 20100318
Time 10.11
INSTRUM spect
PROBHD 5 mm PADUL 13C
PULPROG zgpg30
SOLVENT 102, MeOD
NS 4
DS 16
SWH 2475.248 Hz
FIDRES 2.417234 Hz
AQ 0.2968960 sec
RG 650
DE 6.50 usec
TE 297.0 K
CNS12 145.000000
D0 0.00000300 sec
D1 1.38920295 sec
D4 0.00172414 sec
D11 0.00000000 sec
D13 0.00000000 sec
D16 0.00020000 sec
IN0 0.00003000 sec
ZGPGTNS

===== CHANNEL f1 =====
NUC1 13C
P1 9.60 usec
PL1 0.00 dB
P2 8.00 usec
PL2 0.00 dB
PL1W 24.25185867 W
SFO1 400.1311815 MHz

===== CHANNEL f2 =====
CPDPRG2 13Cgpg
NUC2 13C
P3 8.80 usec
P4 17.80 usec
PCPD2 78.00 usec
PL2 -3.00 dB
PL12 15.00 dB
PL2W 58.5390457 W
SFO2 100.6263124 MHz

===== GRADIENT CHANNEL =====
GPNAM1 SINE 100
GPNAM2 SINE 100
GFZ1 80.00 %
GFZ2 20.10 %
ND0 100.00 usec
TD 2
SFO1 100.6203 MHz
FIDRES 65.108421 Hz
SW 165.650 ppm
PRMODE Echo-Antiecho
SF 400.131267 MHz
VWDW 2
SSB 2
LB 0.00 Hz
GB 0
PC 1.40
SI 512
MC2 echo-antiecho
VWDW 100.6203 MHz
SSB 2
LB 0.00 Hz
GB 0
  
```

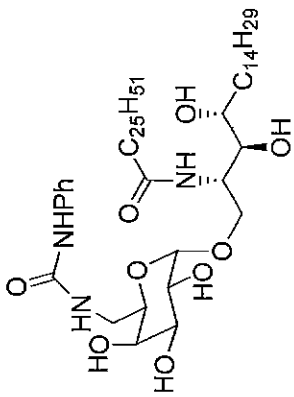

8, 300 MHz (2:1 CDCl<sub>3</sub>:CD<sub>3</sub>OD)

853

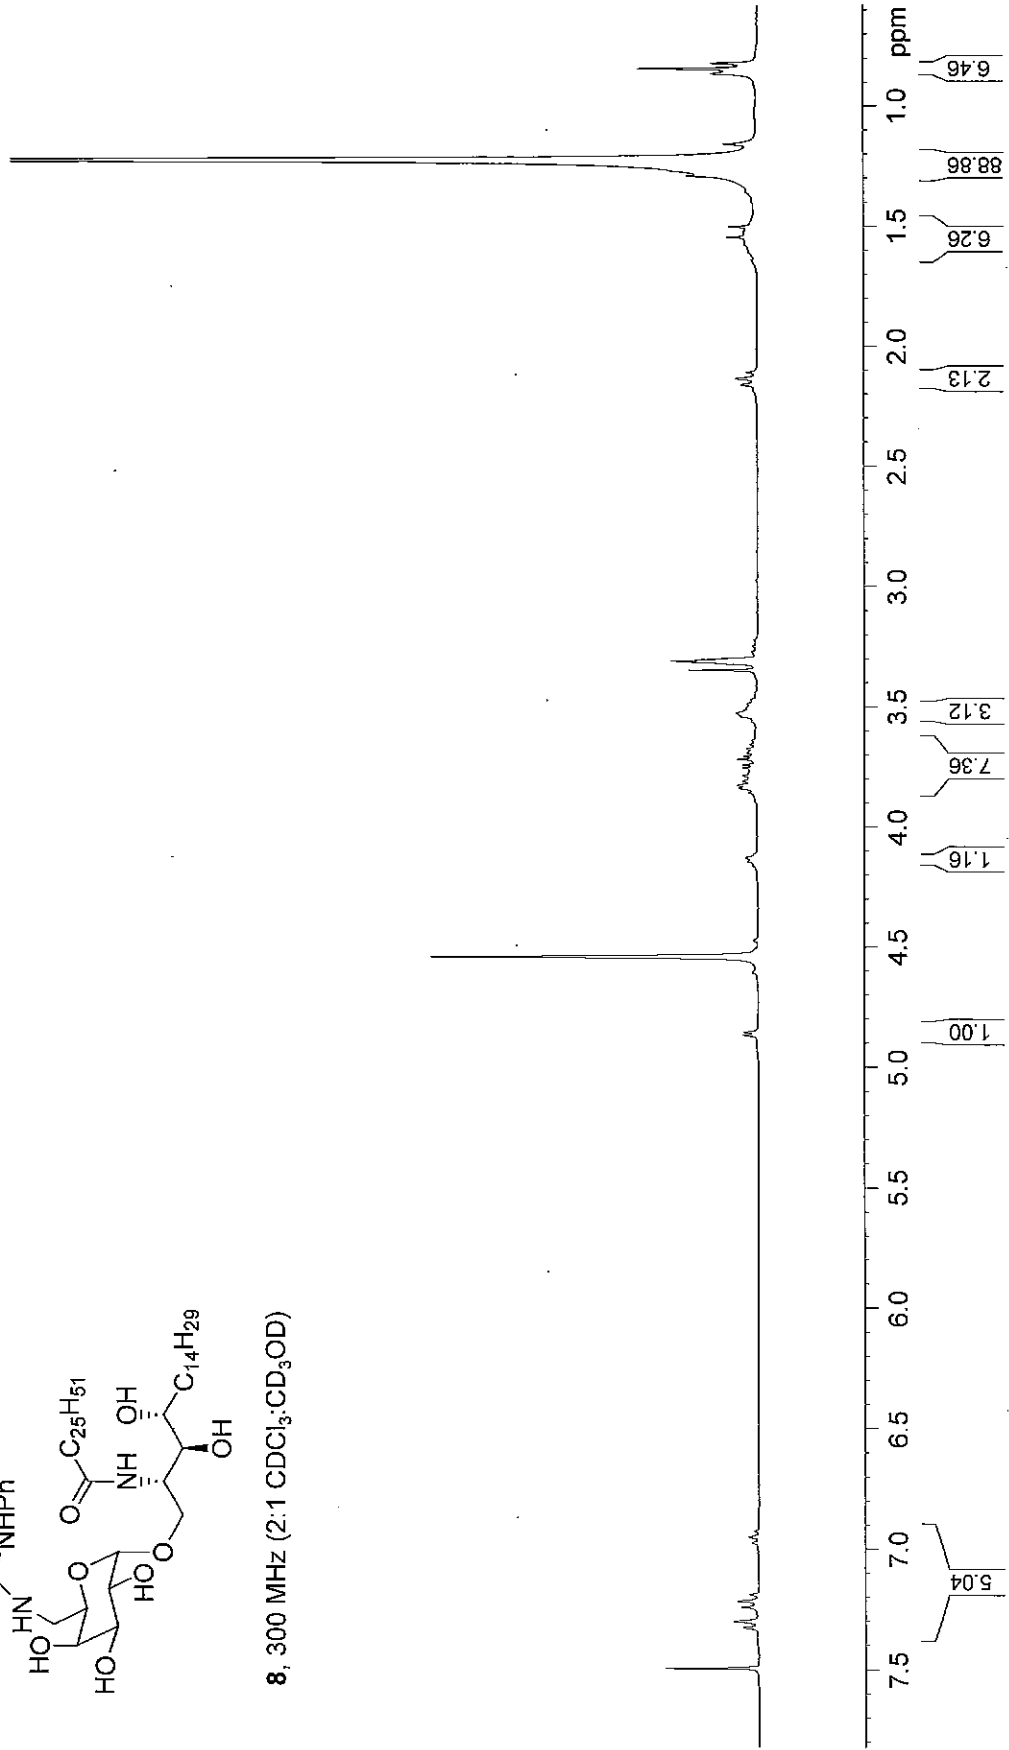

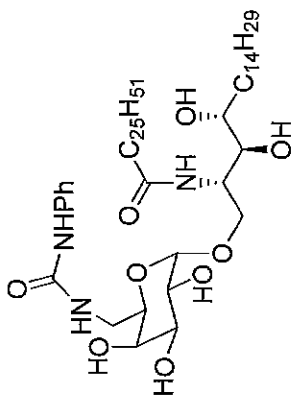

**8**, 100 MHz (2:1 CDCl<sub>3</sub>:CD<sub>3</sub>OD)

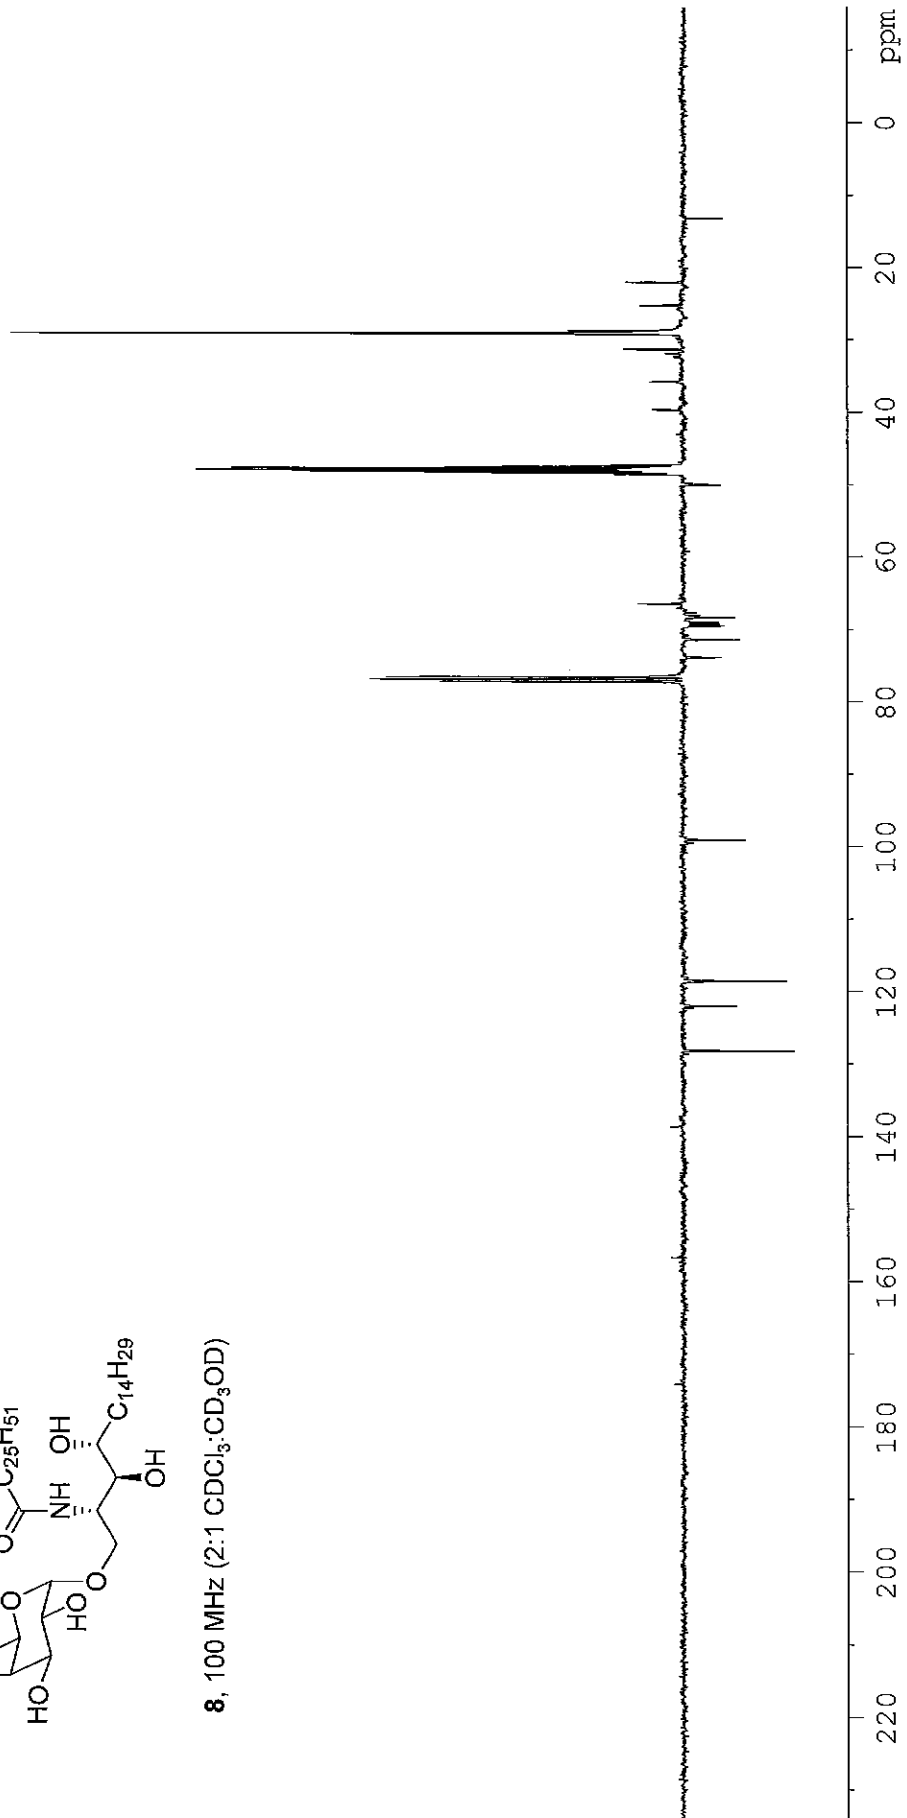

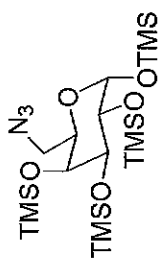

25, 300 MHz (CDCl<sub>3</sub>)

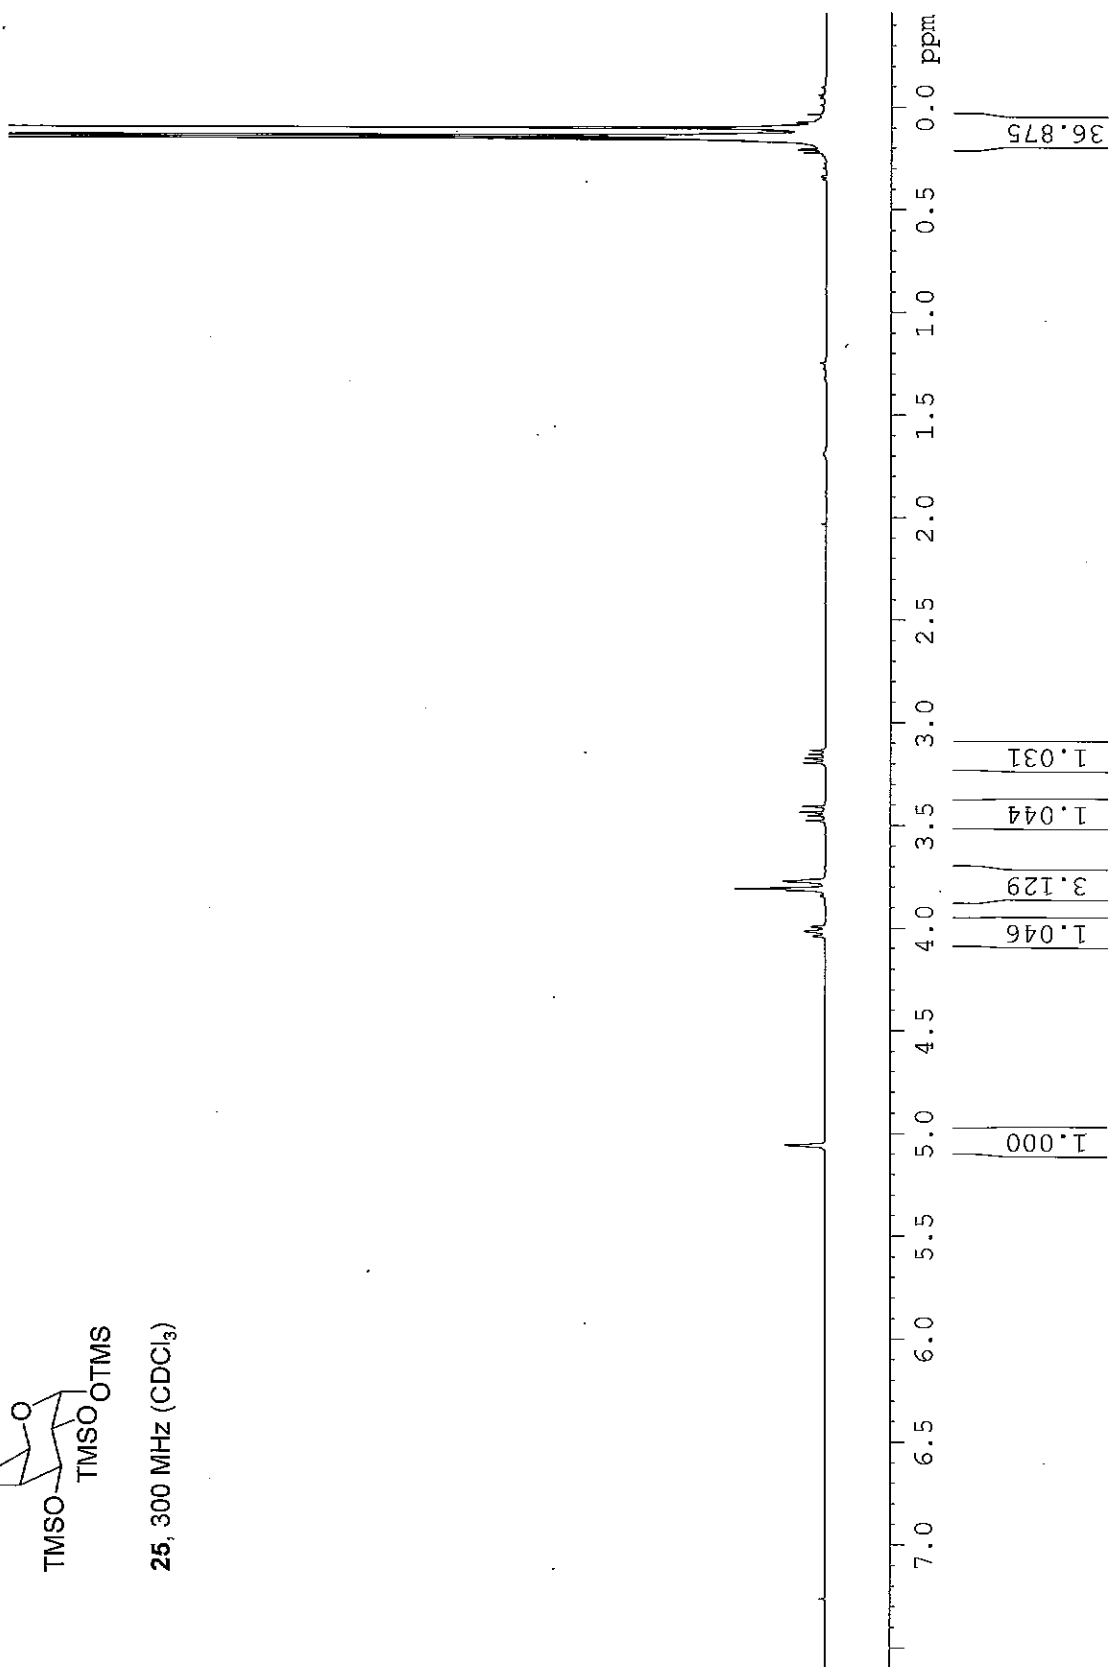

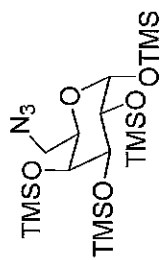

25, 100 MHz (CDCl<sub>3</sub>)

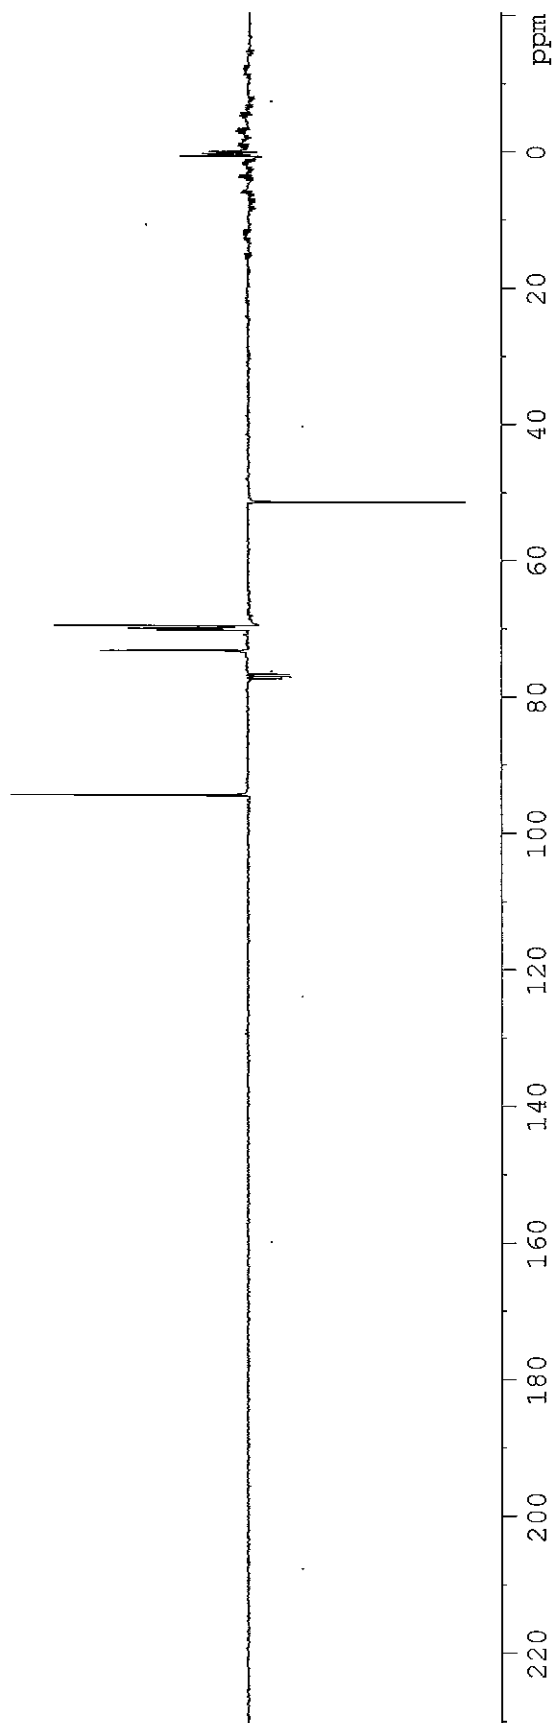

Supplement: jo102064p_si_002.pdf [file jo102064p_si_002.pdf]
